# Supplementary material for: Redox state of Earth’s magma ocean and its Venus-like early atmosphere
Source: PubMed Central journal article supplement — Sci Adv. 2020 Nov 25;6(48):eabd1387. doi: 10.1126/sciadv.abd1387 (PMC7688334; doi:10.1126/sciadv.abd1387), 2020-11-25
Supplement: abd1387_SM.pdf [file abd1387_SM.pdf]

[advances.sciencemag.org/cgi/content/full/6/48/eabd1387/DC1](https://advances.sciencemag.org/cgi/content/full/6/48/eabd1387/DC1)

## Supplementary Materials for

### **Redox state of Earth's magma ocean and its Venus-like early atmosphere**

Paolo A. Sossi\*, Antony D. Burnham, James Badro, Antonio Lanzirotti, Matt Newville, Hugh St.C. O'Neill

\*Corresponding author. Email: [paolo.sossi@erdw.ethz.ch](mailto:paolo.sossi@erdw.ethz.ch)

Published 25 November 2020, *Sci. Adv.* **6**, eabd1387 (2020)  
DOI: [10.1126/sciadv.abd1387](https://doi.org/10.1126/sciadv.abd1387)

#### **This PDF file includes:**

Supplementary text  
Tables S1 to S8  
Figs. S1 to S10  
References

## Supplementary Text

### 1. Temperature profiles and summary of laser levitation experiments

#### *Summary of experimental conditions*

**Table S1.** Conditions (temperature, run time, gas mixtures) of synthesis of peridotite glasses by aerodynamic laser levitation.

| Sample                   | Temperature (°C) | Run time (s) | Ar (%) | CO <sub>2</sub> (%) | H <sub>2</sub> (%) | logfO <sub>2</sub> | Gas Mixture                         |
|--------------------------|------------------|--------------|--------|---------------------|--------------------|--------------------|-------------------------------------|
| Per-fO <sub>2</sub> (1)  | 1900±21          | 30           |        |                     |                    | 0.00               | O <sub>2</sub>                      |
| Per-fO <sub>2</sub> (2)  | 1893±40          | 40           | 92     | 8                   |                    | -2.49              | CO <sub>2</sub>                     |
| Per-fO <sub>2</sub> (3)  | 1861±29          | 32           | 92     | 7.92                | 0.08               | -2.53              | 99CO <sub>2</sub> :1H <sub>2</sub>  |
| Per-fO <sub>2</sub> (6)  | 1878±23          | 25           | 92     | 7.84                | 0.16               | -2.58              | 98CO <sub>2</sub> :2H <sub>2</sub>  |
| Per-TS1                  | 1851±13          | 10           | 92     | 7.6                 | 0.4                | -2.72              | 95CO <sub>2</sub> :5H <sub>2</sub>  |
| Per-fO <sub>2</sub> (7)  | 1866±13          | 27           | 92     | 7.6                 | 0.4                | -2.72              | 95CO <sub>2</sub> :5H <sub>2</sub>  |
| Per-TS2                  | 1875±41          | 120          | 92     | 7.6                 | 0.4                | -2.72              | 95CO <sub>2</sub> :5H <sub>2</sub>  |
| Per-fO <sub>2</sub> (8)  | 1924±13          | 31           | 92     | 7.2                 | 0.8                | -3.00              | 90CO <sub>2</sub> :10H <sub>2</sub> |
| Per-fO <sub>2</sub> (9)  | 1902±15          | 30           | 92     | 6                   | 2                  | -3.92              | 75CO <sub>2</sub> :25H <sub>2</sub> |
| Per-fO <sub>2</sub> (10) | 1900±21          | 30           | 92     | 4                   | 4                  | -5.32              | 50CO <sub>2</sub> :50H <sub>2</sub> |
| Per-fO <sub>2</sub> (11) | 1896±16          | 28           | 92     | 2                   | 6                  | -6.74              | 25CO <sub>2</sub> :75H <sub>2</sub> |
| Per-fO <sub>2</sub> (12) | 1839±17          | 33           | 92     | 0.8                 | 7.2                | -7.86              | 10CO <sub>2</sub> :90H <sub>2</sub> |

*Recorded temperature-time traces of experiments*

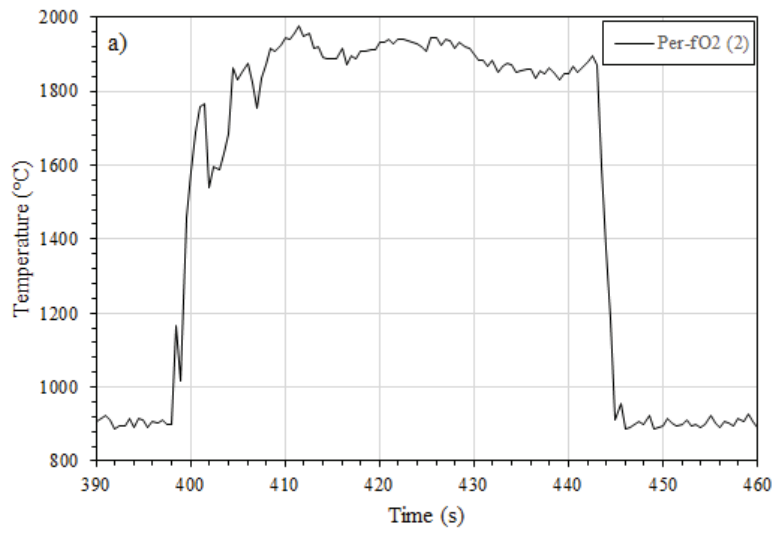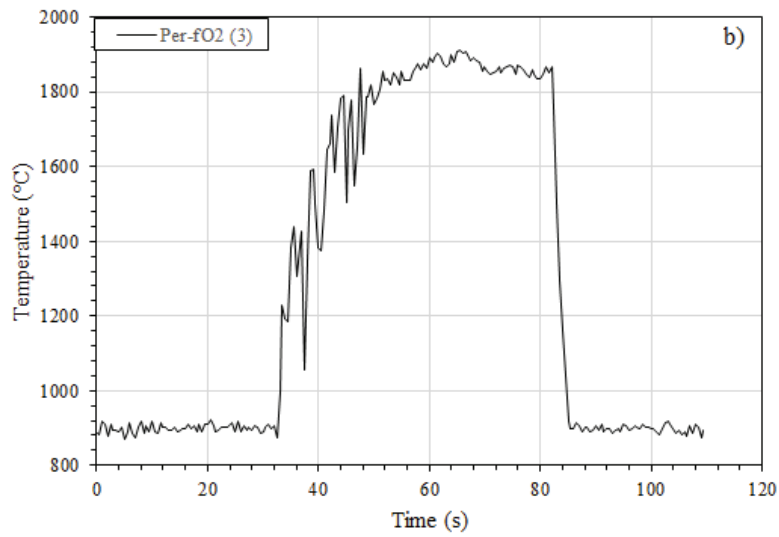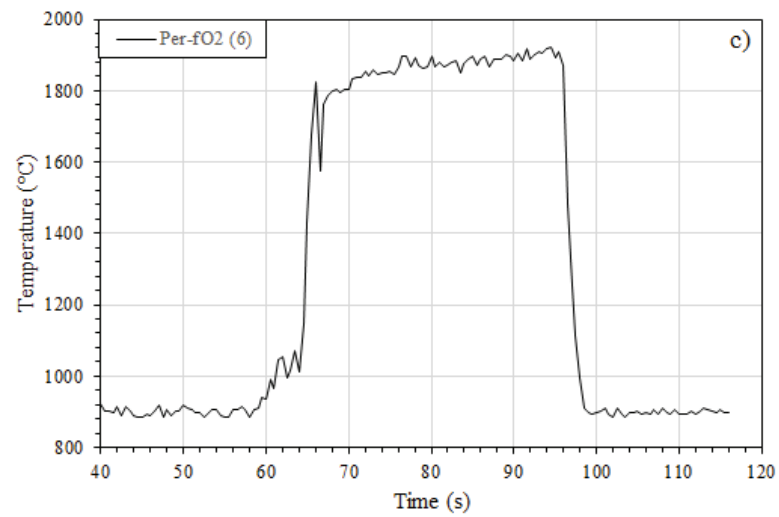

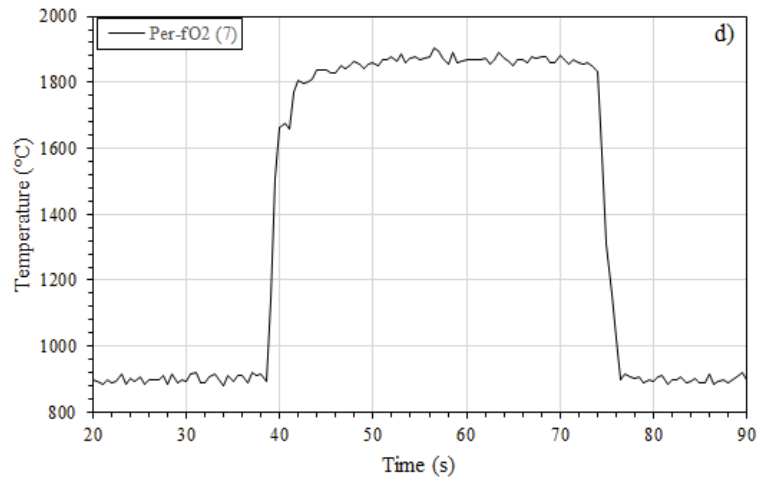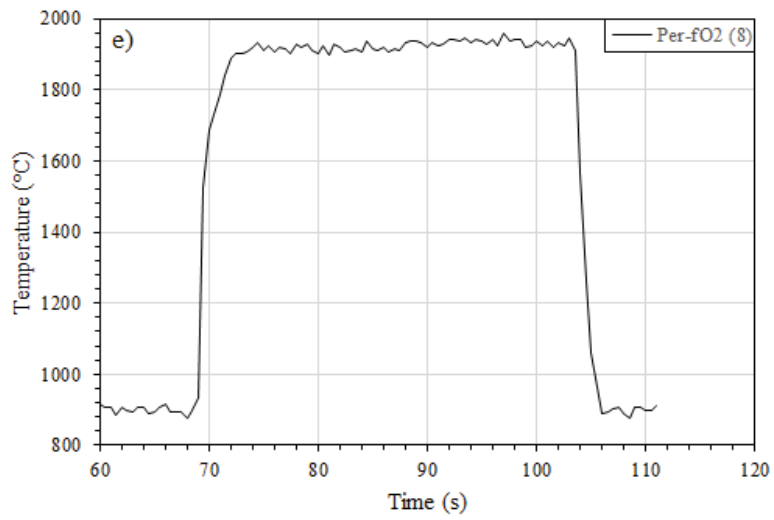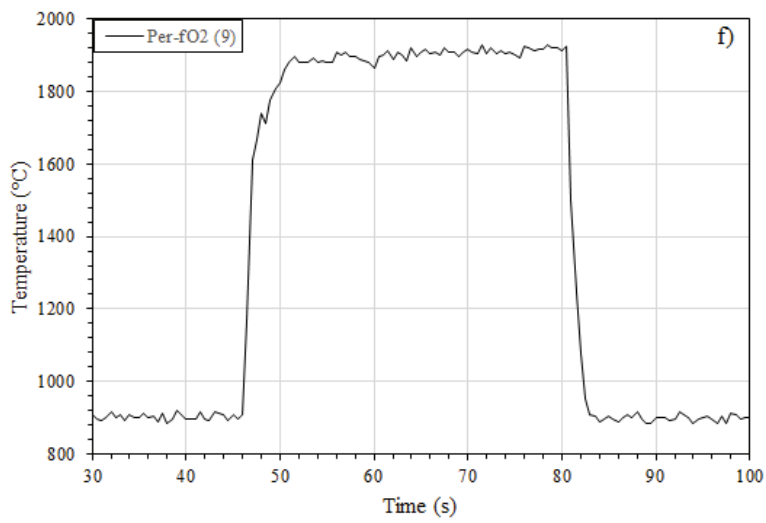

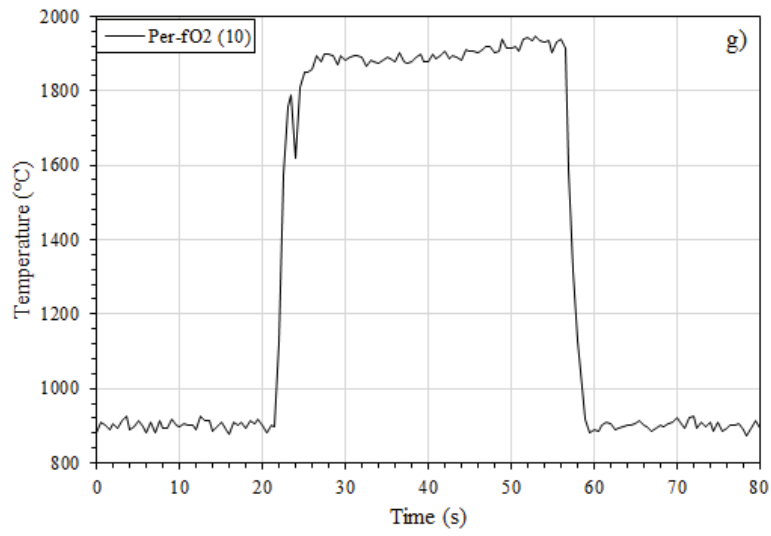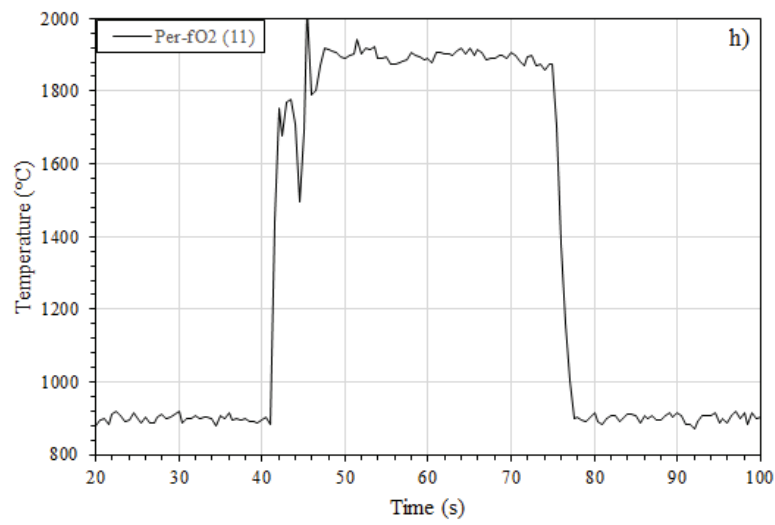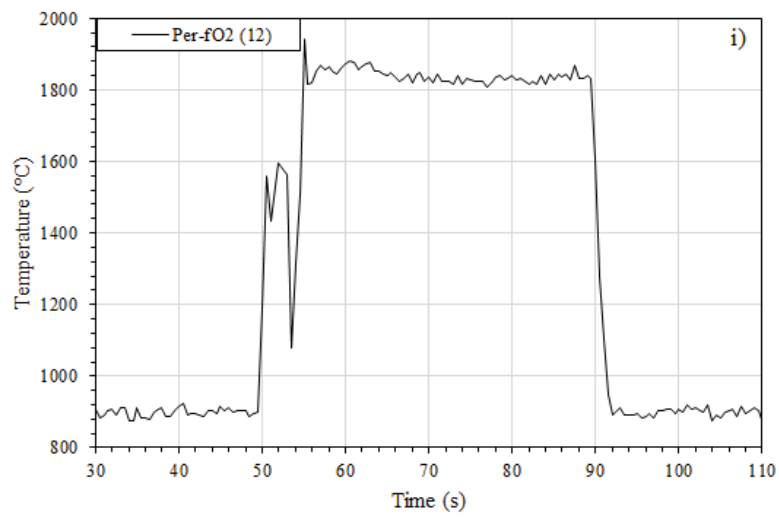

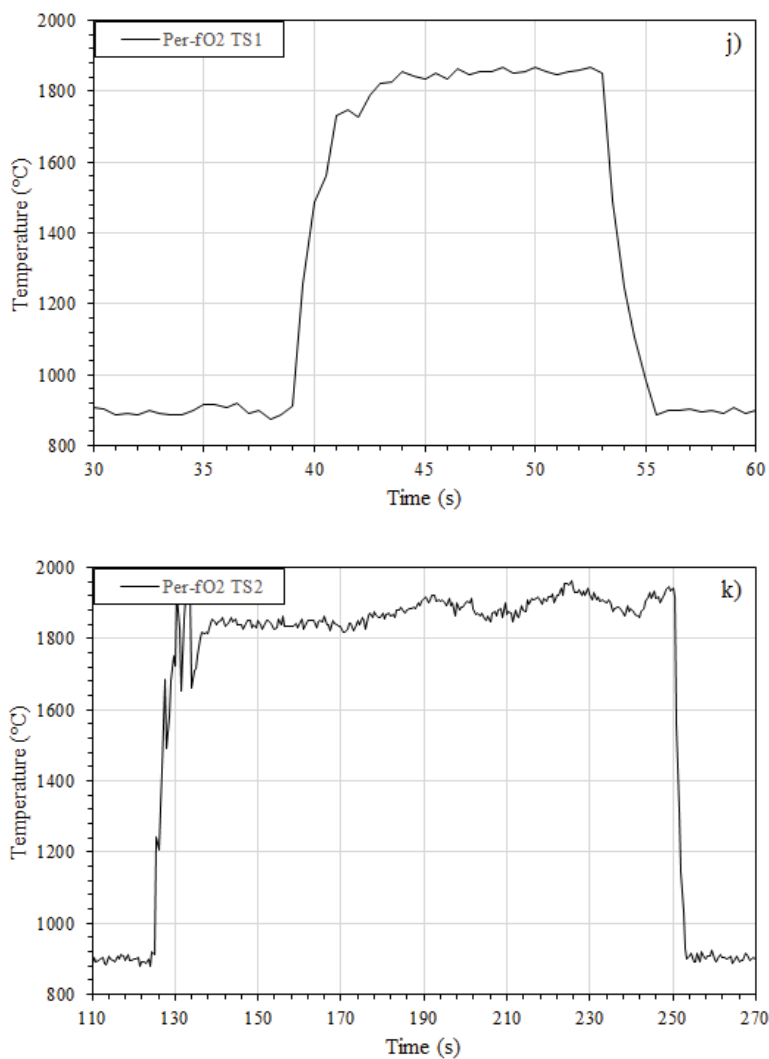

**Fig. S1. a) to k) Temperature-time profiles of experimental glasses.** Temperature of the melt bead during aerodynamic laser levitation experiments recorded *in-situ* by optical pyrometry. Sample name is given on the graph.

The temperature fluctuations observed at the commencement of the heating procedure (particularly in samples Per-fO<sub>2</sub> (2), (3), (12) and TS2) pertain to the instability of the sphere in the gas flow stream. The glass beads may randomly oscillate in the stream prior to entering a stable, aerodynamically levitated state, at which point the temperature control is precise to within  $\pm 15$  °C (Table S1). The run time was calculated over the plateau for which heating was isothermal. The temperature uncertainty quoted in the main text ( $\pm 50$  °C) represents the temperature variability among the samples synthesised, rather than the inherent run precision. Longer sample runs tend to be more unstable (TS2) because of the drift in energy fluence of the CO<sub>2</sub> laser.

## 2. Compositions of experimental glasses

**Table S2:** Electron microprobe analyses of experimental peridotite glasses, with elemental abundances expressed as *wt. %* oxide.

| <b>Sample</b>                     | <b>SiO<sub>2</sub></b> | <b>Al<sub>2</sub>O<sub>3</sub></b> | <b>FeO<sup>(T)</sup></b> | <b>MgO</b> | <b>CaO</b> | <b>Na<sub>2</sub>O</b> | <b>K<sub>2</sub>O</b> | <b>SO<sub>2</sub></b> | <b>Total</b> |
|-----------------------------------|------------------------|------------------------------------|--------------------------|------------|------------|------------------------|-----------------------|-----------------------|--------------|
| Per- <i>f</i> O <sub>2</sub> (1)  | 47.04±0.21             | 4.34±0.06                          | 8.38±0.17                | 37.61±0.10 | 2.02±0.02  | 0.01                   | 0.00                  | 0.00                  | 99.39        |
| Per- <i>f</i> O <sub>2</sub> (2)  | 46.69±0.11             | 4.39±0.03                          | 8.53±0.08                | 37.81±0.15 | 2.07±0.02  | 0.01                   | 0.00                  | 0.01                  | 99.49        |
| Per- <i>f</i> O <sub>2</sub> (3)  | 46.61±0.22             | 4.38±0.05                          | 8.63±0.09                | 37.79±0.12 | 2.07±0.02  | 0.01                   | 0.00                  | 0.00                  | 99.49        |
| Per- <i>f</i> O <sub>2</sub> (6)  | 46.72±0.25             | 4.31±0.05                          | 8.58±0.09                | 37.68±0.13 | 2.07±0.04  | 0.00                   | 0.00                  | 0.01                  | 99.36        |
| Per- <i>f</i> O <sub>2</sub> (7)  | 46.75±0.22             | 4.36±0.04                          | 8.71±0.25                | 37.66±0.10 | 2.07±0.01  | 0.00                   | 0.00                  | 0.00                  | 99.54        |
| Per- <i>f</i> O <sub>2</sub> (8)  | 46.06±0.14             | 4.39±0.04                          | 8.66±0.07                | 38.13±0.13 | 2.08±0.02  | 0.00                   | 0.00                  | 0.00                  | 99.32        |
| Per- <i>f</i> O <sub>2</sub> (9)  | 46.11±0.26             | 4.37±0.05                          | 8.21±0.17                | 38.79±0.06 | 1.96±0.01  | 0.00                   | 0.00                  | 0.00                  | 99.43        |
| Per- <i>f</i> O <sub>2</sub> (10) | 46.71±0.15             | 4.43±0.04                          | 8.47±0.15                | 37.80±0.30 | 2.11±0.03  | 0.00                   | 0.00                  | 0.01                  | 99.51        |
| Per- <i>f</i> O <sub>2</sub> (11) | 46.22±0.28             | 4.42±0.04                          | 7.89±0.13                | 38.91±0.18 | 2.12±0.02  | 0.00                   | 0.00                  | 0.00                  | 99.55        |
| Per- <i>f</i> O <sub>2</sub> (12) | 46.53±0.12             | 4.45±0.08                          | 7.80±0.08                | 38.52±0.16 | 2.15±0.02  | 0.00                   | 0.00                  | 0.00                  | 99.44        |
| Per-TS1                           | 46.45±0.16             | 4.32±0.05                          | 8.87±0.13                | 37.62±0.10 | 2.04±0.02  | 0.01                   | 0.00                  | 0.01                  | 99.30        |
| Per-TS2                           | 46.50±0.11             | 4.36±0.05                          | 8.56±0.09                | 38.01±0.18 | 2.08±0.02  | 0.00                   | 0.00                  | 0.01                  | 99.51        |

### 3. Treatment and quantification of XANES spectra

*Normalised XANES spectra of peridotite glasses*

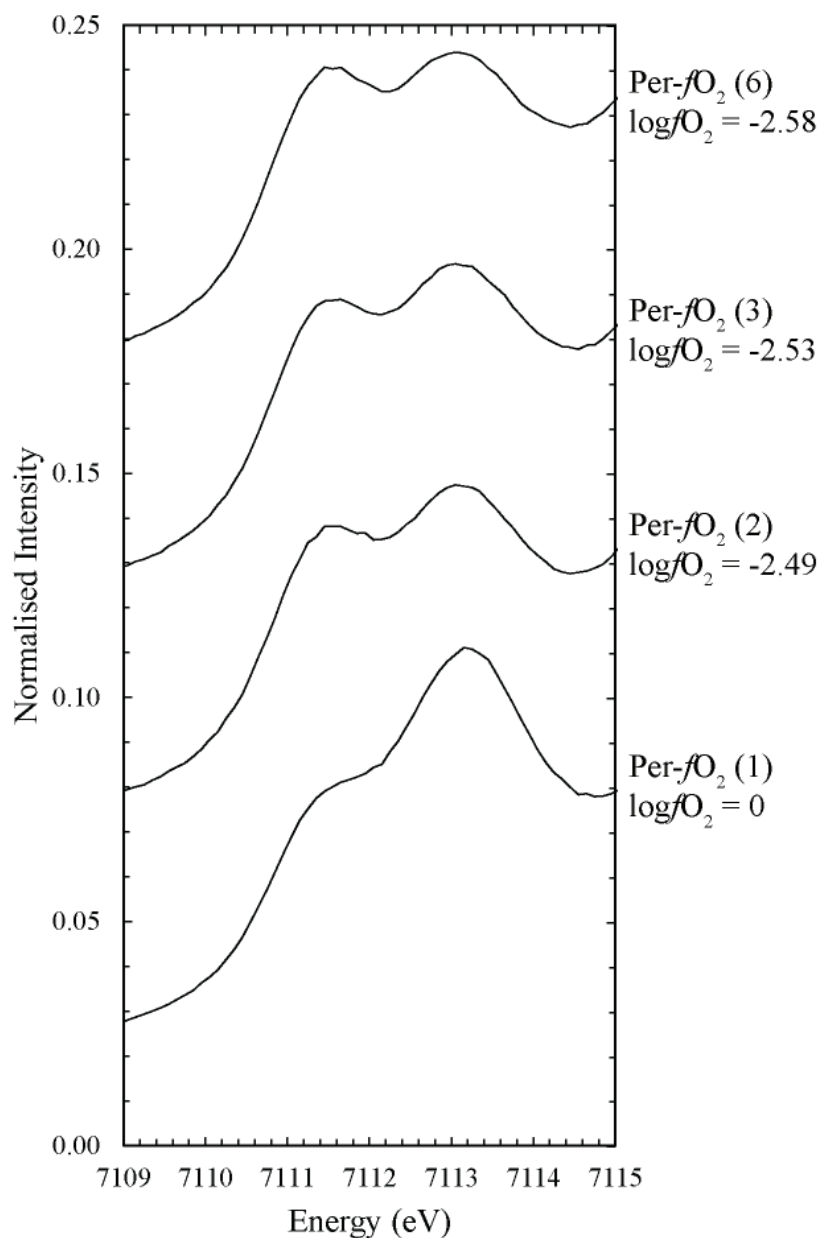

**Fig. S2. Fe K-edge XANES pre-edge feature of oxidised glasses.** Normalised (to 1) absorption spectra of Fe K-edge XANES depicting the pre-edge feature in the four most oxidised peridotite glasses (as labelled on the figure), scans offset vertically for clarity.



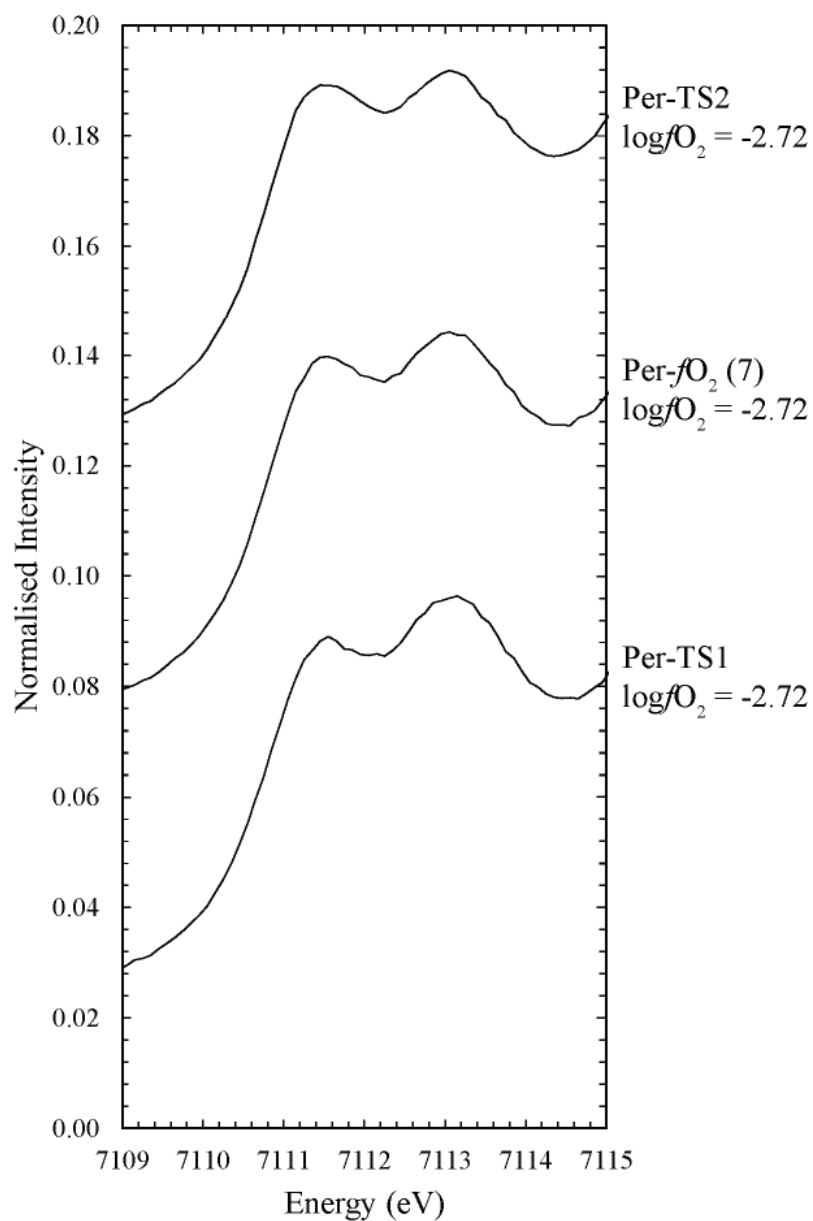

**Fig. S3. Fe K-edge XANES pre-edge feature of intermediate glasses.** Normalised (to 1) absorption spectra of Fe K-edge XANES depicting the pre-edge feature in the three ‘time-series’ experiments (as labelled on the figure), scans offset vertically for clarity.

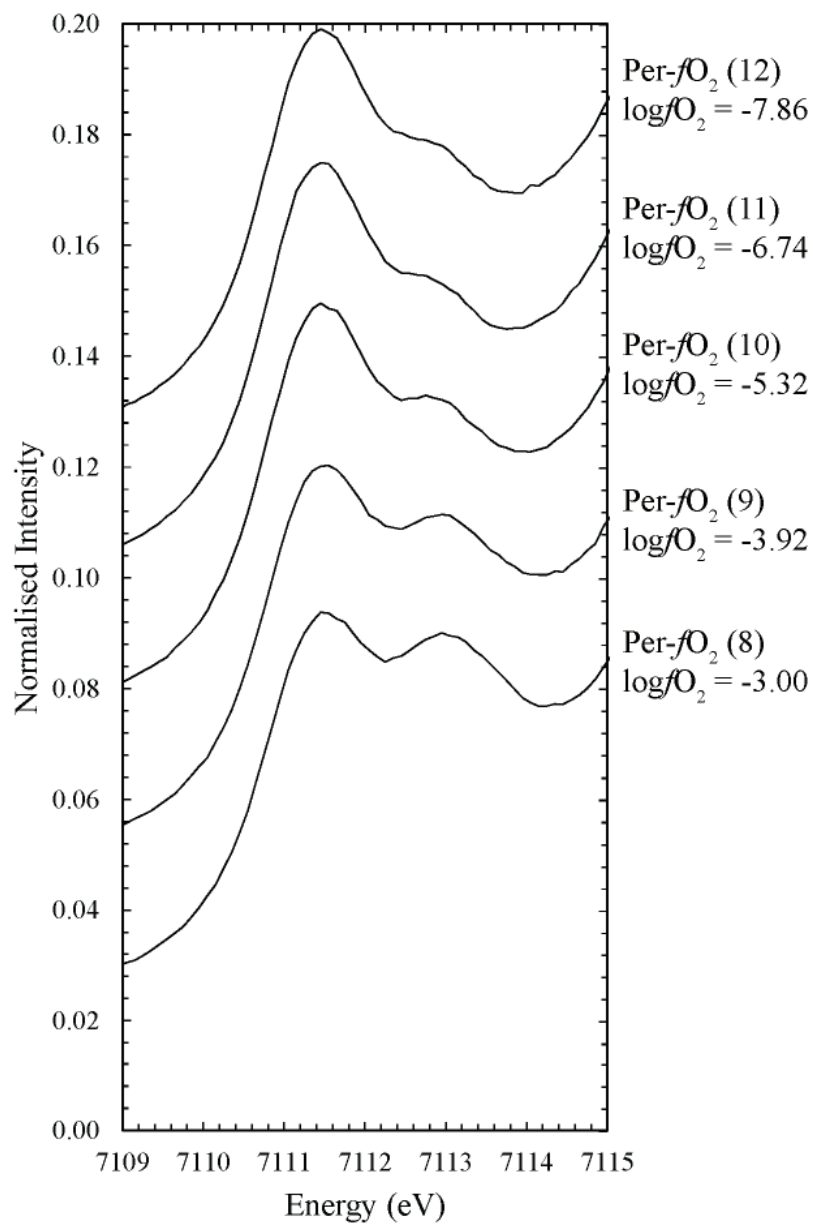

**Fig. S4. Fe K-edge XANES pre-edge feature of reduced glasses.** Normalised (to 1) absorption spectra of Fe K-edge XANES depicting the pre-edge feature in the five most reduced peridotite glasses (as labelled on the figure), scans offset vertically for clarity.

### Calculation of $Fe^{3+}/\Sigma Fe$ ratios from XANES spectra of peridotite glasses

In order to calculate the  $Fe^{3+}/\Sigma Fe$  ratio of the peridotite glasses, two features of the XANES spectra, the 0.8 edge energy (hereafter, ‘Edge’) and the centroid energy of the pre-edge feature (1s→3d electron transition; hereafter ‘Centroid’) are compared with those measured in synthetic Mid-Ocean Ridge Basalt (MORB) glasses, whose  $Fe^{3+}/\Sigma Fe$  ratio is calibrated by independent means, namely, Mössbauer spectroscopy (31).

The XANES spectra of both the peridotite glasses and the MORB glasses were collected during the same analytical session at beamline 13IDE, Advanced Photon Source, Argonne National Laboratories (IL, USA). As such, the Edge and Centroid energies of the MORB glasses differ from the values given in ref. (31), their Table 2, due to a systematic offset in the energy calibration of  $1.2\pm 0.1$  eV between beamline I18, Diamond Light Source, Oxford, UK and beamline 13IDE. As such, in this study, the energy calibration is internally consistent between MORB glass standards and peridotite glass samples. As the glasses are the same samples analysed in ref. (31), both  $Fe^{3+}/\Sigma Fe$  and  $fO_2$  of the MORB standard glasses are known (their Table 2).

To calculate the  $Fe^{3+}/\Sigma Fe$  of the peridotite glasses, a global fit to the recorded Edge and Centroid energy values as a function of  $Fe^{3+}/\Sigma Fe$  in the MORB glasses was performed. In this model, we derive expressions relating the Edge and Centroid energies to the  $Fe^{3+}/\Sigma Fe$  values determined by the Mössbauer-based model global fit of ref. (31) (their Table 2). In order to do so with the least misfit, one must consider

- i) The appropriate peak shape (Gaussian, Lorentzian, or a combination) to fit the  $Fe^{2+}$  and  $Fe^{3+}$  contributions to the pre-edge Centroid energy
- ii) A functional form relating the Edge energy and Centroid energy to  $Fe^{3+}/\Sigma Fe$

We therefore test several models, including fits using 2 Gaussian peaks, 2 Lorentzian peaks, and 1 Lorentzian and 1 Gaussian to the Centroid energy; and  $n$ -order polynomials ( $n = 3, 4$ ) to quantify the relationship between  $n$  and  $Fe^{3+}/\Sigma Fe$ , by minimising the misfit to the objective function:

$$\chi^2 = \sum \frac{(Edge_{meas} - Edge_{calc})^2}{\sigma(Edge)} + \sum \frac{(Centroid_{meas} - Centroid_{calc})^2}{\sigma(Centroid)} \quad (S1)$$

Where ‘Edge’ and ‘Centroid’ are in eV and  $\sigma$  is their associated standard deviation, in eV. For the synthetic tests, we make the transformation ‘Centroid’ =  $Centroid_{meas} - 7111$  eV and ‘Edge’ =  $Edge_{meas} - 7120$  eV, in order to make the minimisation more tractable. The results of these tests are presented in Table S3, below.

**Table S3.** Results of synthetic tests with XANES spectra of the MORB glasses of ref. (31) used to determine the goodness of fit of polynomial functions relating (A)  $\text{Fe}^{3+}/\Sigma\text{Fe}$  to 0.8 Edge Energy (B)  $\text{Fe}^{3+}/\Sigma\text{Fe}$  to Centroid Energy and (C)  $\text{Fe}^{3+}/\Sigma\text{Fe}$  (Centroid energy) to  $\text{Fe}^{3+}/\Sigma\text{Fe}$  (0.8 Edge Energy).

| MORB glasses<br>(31) | A)<br>$\text{Fe}^{3+}/\Sigma\text{Fe}$<br>vs. 0.8<br>Edge<br>Energy |        | B) $\text{Fe}^{3+}/\Sigma\text{Fe}$ vs. Centroid Energy |       |       | C) $\text{Fe}^{3+}/\Sigma\text{Fe}$ (Centroid Energy) vs.<br>$\text{Fe}^{3+}/\Sigma\text{Fe}$ (0.8 Edge Energy) |    |       |       |       |
|----------------------|---------------------------------------------------------------------|--------|---------------------------------------------------------|-------|-------|-----------------------------------------------------------------------------------------------------------------|----|-------|-------|-------|
|                      | a0                                                                  | -0.016 | b0                                                      | -0.78 | -0.61 | -0.76                                                                                                           | c0 | -2.24 | -1.18 | -1.61 |
|                      | a1                                                                  | 0.150  | b1                                                      | 1.34  | 1.44  | 1.48                                                                                                            | c1 | 2.74  | 2.14  | 1.99  |
|                      | a2                                                                  | -0.008 | b2                                                      | -0.64 | -0.88 | -0.83                                                                                                           | c2 | 0.19  | 0.22  | 0.39  |
|                      | a3                                                                  |        | b3                                                      | 0.17  | 0.25  | 0.23                                                                                                            | c3 |       |       |       |

  

| Data                             |          | Misfit (3<br>term) | Misfit (4-term) |       |               | Misfit (3-term) |       |               |
|----------------------------------|----------|--------------------|-----------------|-------|---------------|-----------------|-------|---------------|
| $\text{Fe}^{3+}/\Sigma\text{Fe}$ | $\sigma$ |                    | 2 Gau           | 2 Lor | 1 Gau & 1 Lor | 2 Gau           | 2 Lor | 1 Gau & 1 Lor |
| 0.775                            | 0.010    | -1.75              | 1.16            | 1.06  | 1.16          | 0.18            | 0.24  | 0.15          |
| 0.662                            | 0.010    | 1.39               | -0.03           | -0.70 | -0.94         | -0.06           | -0.09 | -0.11         |
| 0.524                            | 0.010    | 1.43               | -2.65           | -1.17 | -1.06         | -0.21           | -0.22 | -0.15         |
| 0.404                            | 0.020    | 0.33               | -0.73           | -0.34 | -0.22         | -0.10           | -0.14 | -0.09         |
| 0.251                            | 0.007    | 0.65               | 3.89            | 2.54  | 2.53          | 0.21            | 0.20  | 0.16          |
| 0.162                            | 0.006    | -0.03              | 0.46            | 0.04  | -0.46         | 0.09            | 0.15  | 0.08          |
| 0.098                            | 0.005    | -0.81              | -0.83           | -1.86 | -1.72         | 0.05            | 0.07  | 0.05          |
| 0.059                            | 0.004    | -0.16              | 1.11            | 1.05  | 0.64          | 0.03            | 0.05  | 0.04          |
| 0.034                            | 0.003    | 0.04               | -0.52           | -0.79 | 0.14          | -0.04           | -0.04 | -0.02         |
| 0.019                            | 0.002    | -2.95              | -0.52           | 0.70  | 0.31          | -0.02           | -0.02 | 0.00          |
| 0.011                            | 0.001    | -0.44              | 6.29            | 4.38  | 3.93          | -0.03           | -0.07 | -0.04         |
| 0.006                            | 0.001    | 1.89               | -6.41           | -4.63 | -4.13         | -0.12           | -0.13 | -0.10         |

  

| Global misfit ( $\chi^2$ ) |  |              |       |       |             |      |      |             |
|----------------------------|--|--------------|-------|-------|-------------|------|------|-------------|
| 3 term                     |  | <b>20.68</b> | 118.5 | 104.5 | 68.4        | 0.16 | 0.23 | <b>0.14</b> |
| 4 term                     |  | 8.00         | 107.4 | 55.8  | <b>46.0</b> | 0.03 | 0.02 | 0.02        |

\* Misfit relative to the MORB glass data is shown for the different peak forms for the 4-term polynomial (Centroid Energy) and a 3-term polynomial (0.8 Edge Energy), with global misfit shown for both 3- and 4-term polynomials. Bold text represents the calibration chosen.

In finding a function to fit the dependence of Edge energy on  $\text{Fe}^{3+}/\Sigma\text{Fe}$  (synthetic test A), the misfit improves only marginally from the 3- to 4-term polynomial, and is already low in both cases (<21). This relates to a mean offset of calculated  $\text{Fe}^{3+}/\Sigma\text{Fe}$  compared to measured values of  $\pm 0.005$ . When compared to the  $\text{Fe}^{3+}/\Sigma\text{Fe}$  determined by Mössbauer spectroscopy, the 1 Gaussian and 1 Lorentzian peak fits to the Centroid Energy yield lower (i.e., better) misfit to the observed  $\text{Fe}^{3+}/\Sigma\text{Fe}$  for both the 3-term and 4-term fits (synthetic test B). The global  $\chi^2$  of 46.0 in the 4 term fit reflects an absolute uncertainty in  $\text{Fe}^{3+}/\Sigma\text{Fe}$  of  $\pm 0.006$ . Moreover, the 1 Gaussian + Lorentzian peak fit produced  $\text{Fe}^{3+}/\Sigma\text{Fe}$  values that were in closest agreement with the 3-term polynomial fit to the 0.8 Edge energy (synthetic test C), and were therefore adopted throughout. The misfit between the observed and calculated Centroid energy improves markedly when passing from a 3-term to a 4-term polynomial (Table S3). Therefore, the 4-term and 3-term polynomials are taken to functionally fit the Centroid energy and the Edge energy, respectively:

$$\frac{\text{Fe}^{3+}}{\Sigma\text{Fe}_{calc}} = a_0 + a_1(\text{Edge}_{meas} - 7120) + a_2(\text{Edge}_{meas} - 7120)^2 \quad (\text{S2})$$

$$\frac{Fe^{3+}}{\sum Fe_{calc}} = b_0 + b_1(Cent_{meas} - 7111) + b_2(Cent_{meas} - 7111)^2 + b_3(Cent_{meas} - 7111)^3 \quad (S3)$$

Best fit values yield for  $a_0 = -0.0157$ ,  $a_1 = 0.1495$ ,  $a_2 = 0.0083$  and for  $b_0 = -0.7594$ ,  $b_1 = 1.4792$ ,  $b_2 = -0.8300$ ,  $b_3 = 0.2283$ . Once established, these expressions can be used in order to calculate the  $Fe^{3+}/\sum Fe$  ratios of the peridotite glasses from their measured Centroid and Edge energies.

However, the use of basaltic glasses to calibrate glasses of peridotitic composition is not necessarily substantiated *a priori*, as XANES spectra are not only sensitive to the oxidation state of Fe, but also to its overall bonding environment, which is influenced by composition (83). The composition of the synthetic MORB glass used for the standards is given in ref. (31), and is  $SiO_2$  (52.0 wt. %),  $Al_2O_3$  (16.1 wt. %),  $CaO$  (12.4 wt. %),  $FeO^{(T)}$  (10.0 wt. %),  $MgO$  (8.2 wt. %) and  $TiO_2$  (1.3 wt.%), which differs notably in its higher  $Al_2O_3$ ,  $CaO$  and lower  $MgO$  contents compared to the peridotite glass (Table S2). Moreover, the Edge energy can be influenced by self-absorption depending on the mean atomic number of the medium through which the X-rays pass. However, the predominant contribution affecting this shift is the iron content of the glass itself, and typically only above the edge energy (84). Therefore, it may be expected that such a  $Fe^{3+}/\sum Fe$  edge/centroid energy calibration would hold for glasses with similar iron contents, as in the MORB glass (10.0 wt. %  $FeO^{(T)}$ ) and peridotite glass (8.44 wt. %  $FeO^{(T)}$ ).

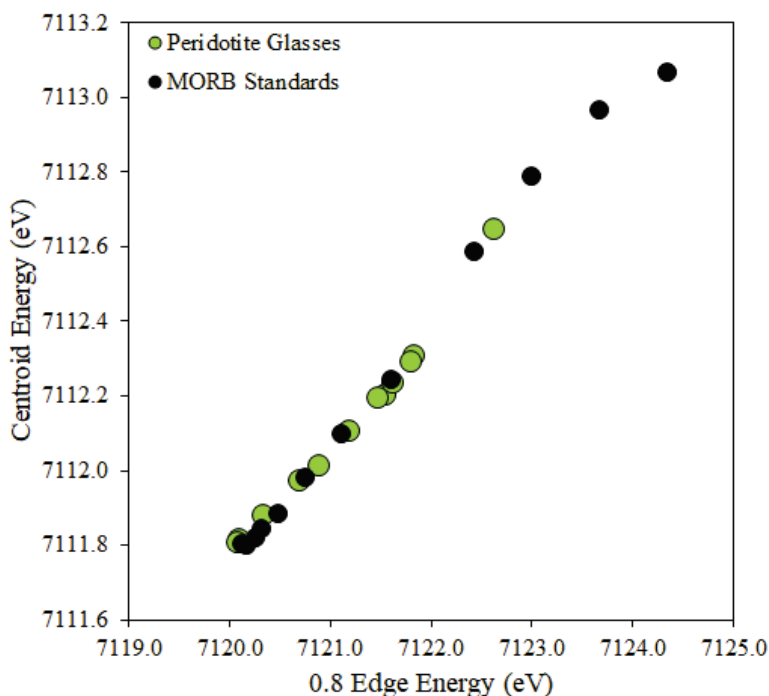

**Fig. S5. Centroid vs. Edge energy of peridotite- and MORB glasses.** The Centroid energy plotted against the 0.8 Edge energy for both the unknown peridotite glasses (green circles) and the calibration MORB glasses (black). The concurrence of the two series indicates that there is no systematic effect of composition on the relationship between the two quantities, meaning their variation is solely a function of  $Fe^{3+}/\sum Fe$  ratio.

In order to evaluate the suitability of the MORB glasses as calibration standards for peridotite glasses, the relationship between measured Centroid- and Edge energies for each glass is plotted in Fig. S5. As evidenced from Fig. S5, the ‘unknown’ peridotite glasses fall on the same Centroid Energy – Edge Energy relationship defined by the MORB glasses of ref. (31). As such, the equations relating  $Fe^{3+}/\sum Fe$  to both Centroid energy and Edge energy can be used in tandem to more precisely determine

$\text{Fe}^{3+}/\Sigma\text{Fe}$  in the peridotite glasses. These  $\text{Fe}^{3+}/\Sigma\text{Fe}$  ratios are then related to the  $\log f\text{O}_2$  calculated for the individual gas mixture at 1900°C, and are shown in Table S4.

**Table S4.** A summary of experimental conditions of peridotite and MORB glasses, together with their determined 0.8 Edge and Centroid energies measured at 13IDE, and the  $\text{Fe}^{3+}/\Sigma\text{Fe}$  ratios derived from eq. S2 and S3 (peridotite glasses) and reported in ref. (31), their Table 2 (MORB glasses).

| Sample                                | Temperature (°C) | $\log f\text{O}_2$ | 0.8 Edge Energy (eV) | Centroid Energy (eV) | $\text{Fe}^{3+}/\Sigma\text{Fe}$ |
|---------------------------------------|------------------|--------------------|----------------------|----------------------|----------------------------------|
| <i>Peridotite glasses (this work)</i> |                  |                    |                      |                      |                                  |
| Per- $f\text{O}_2$ (1)                | 1900±21          | 0.00               | 7122.624             | 7112.648             | 0.440±0.008                      |
| Per- $f\text{O}_2$ (2)                | 1893±40          | -2.49              | 7121.833             | 7112.310             | 0.277±0.013                      |
| Per- $f\text{O}_2$ (3)                | 1861±29          | -2.53              | 7121.792             | 7112.292             | 0.269±0.015                      |
| Per- $f\text{O}_2$ (6)                | 1878±23          | -2.58              | 7121.547             | 7112.206             | 0.226±0.013                      |
| Per-TS1                               | 1851±13          | -2.72              | 7121.780             | 7112.291             | 0.267±0.013                      |
| Per- $f\text{O}_2$ (7)                | 1866±13          | -2.72              | 7121.622             | 7112.235             | 0.240±0.013                      |
| Per-TS2                               | 1875±41          | -2.72              | 7121.460             | 7112.167             | 0.217±0.012                      |
| Per- $f\text{O}_2$ (8)                | 1924±13          | -3.00              | 7121.184             | 7112.106             | 0.172±0.006                      |
| Per- $f\text{O}_2$ (9)                | 1902±15          | -3.92              | 7120.885             | 7112.015             | 0.124±0.006                      |
| Per- $f\text{O}_2$ (10)               | 1900±21          | -5.32              | 7120.335             | 7111.879             | 0.045±0.015                      |
| Per- $f\text{O}_2$ (11)               | 1896±16          | -6.74              | 7120.085             | 7111.815             | 0.019±0.010                      |
| Per- $f\text{O}_2$ (12)               | 1839±17          | -7.86              | 7120.079             | 7111.807             | 0.014±0.009                      |
| <i>MORB glasses (ref. (31))*</i>      |                  |                    |                      |                      |                                  |
| MORB0                                 | 1400±2           | 0.00               | 7124.353             | 7113.065             | 0.775±0.010                      |
| MORB-1                                | 1400±2           | -1.00              | 7123.685             | 7112.962             | 0.662±0.010                      |
| MORB-2                                | 1400±2           | -2.00              | 7123.010             | 7112.865             | 0.524±0.010                      |
| MORB-3.07                             | 1400±2           | -3.07              | 7122.433             | 7112.433             | 0.404±0.020                      |
| MORB-4                                | 1400±2           | -4.00              | 7121.610             | 7112.239             | 0.251±0.007                      |
| MORB-5                                | 1400±2           | -5.00              | 7121.120             | 7112.095             | 0.162±0.006                      |
| MORB-6                                | 1400±2           | -6.00              | 7120.756             | 7111.978             | 0.098±0.005                      |
| MORB-7                                | 1400±2           | -7.00              | 7120.491             | 7111.833             | 0.059±0.004                      |
| MORB-8                                | 1400±2           | -8.00              | 7120.326             | 7111.841             | 0.034±0.003                      |
| MORB-9                                | 1400±2           | -9.00              | 7120.268             | 7111.815             | 0.019±0.002                      |
| MORB-10                               | 1400±2           | -10.00             | 7120.180             | 7111.796             | 0.011±0.001                      |
| MORB-11                               | 1400±2           | -11.00             | 7120.132             | 7111.801             | 0.006±0.001                      |

\*Glasses are the same as those measured in ref. (31). XANES spectra were re-collected at the same time as the peridotite glass samples in order to determine the Edge- and Centroid energies. The  $\text{Fe}^{3+}/\Sigma\text{Fe}$  contents are taken from ref. (31), as quantified by best fits to  $f\text{O}_2$ - $\text{Fe}^{3+}/\Sigma\text{Fe}$  systematics determined by Mössbauer spectroscopy.

Three experiments were run for different durations at the same temperature and under the same gas mixture in order to assess the effect of run time on the observed  $\text{Fe}^{3+}/\Sigma\text{Fe}$ , and therefore the time for the melt to equilibrate with the gas mixture at high temperature. The samples subjected to the time series test were labelled Per-TS1 (10 s), Per- $f\text{O}_2$  (7) (30 s) and Per-TS2 (120 s), and their calculated  $\text{Fe}^{3+}/\Sigma\text{Fe}$  ratios are shown plotted against run duration (Fig. S6).

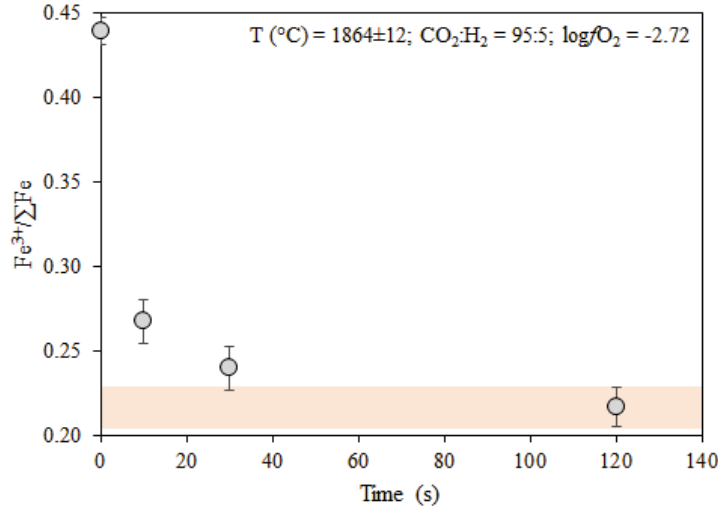

**Fig. S6. Time series evolution of  $\text{Fe}^{3+}/\Sigma\text{Fe}$  in peridotite glasses.** Variation in the measured  $\text{Fe}^{3+}/\Sigma\text{Fe}$  of quenched peridotite liquids as a function of time at constant temperature ( $1864\pm 12$ ) and  $\log f\text{O}_2$  ( $-2.72$ ). The initial value of  $0.440\pm 0.008$  comes from the fact that all glasses were first pre-equilibrated in pure  $\text{O}_2$  at  $2173$  K prior to re-equilibration at the desired  $f\text{O}_2$ .

Because all glasses were pre-melted first in pure oxygen, the initial  $\text{Fe}^{3+}/\Sigma\text{Fe}$  of the starting glass is given by sample Per- $f\text{O}_2$  (1), with  $\text{Fe}^{3+}/\Sigma\text{Fe} = 0.440\pm 0.008$ . Sample Per-TS1, run for 10 s, records resolvably higher  $\text{Fe}^{3+}/\Sigma\text{Fe}$ ,  $0.267\pm 0.011$ , than either of the longer duration experiments under the same conditions (Per- $f\text{O}_2$  (7) and Per-TS2), with  $0.240\pm 0.013$  and  $0.217\pm 0.012$ , respectively. This value lies intermediate between those recorded by the starting glass and the longer run durations, and, importantly, is also higher than that determined in sample Per- $f\text{O}_2$  (6),  $0.226\pm 0.013$ , run at marginally higher oxygen fugacity ( $\log f\text{O}_2 = -2.58$ ). Taken together, these features are indicative of incomplete equilibration of the melt with the gas mixture after 10 s at  $\sim 2150$  K in sample Per-TS1. By contrast, the experiments run at 30 s and 120 s have  $\text{Fe}^{3+}/\Sigma\text{Fe}$  within uncertainty of one another, and within uncertainty of Per- $f\text{O}_2$  (6). This suggests the melt and gas mixture equilibrate after  $\sim 30$  s.

In order to better quantify the expected equilibration time, the diffusion timescale can be estimated from:

$$t = r^2/D$$

where  $t$  = time in (s),  $r$  = the radius of the melt sphere (0.001 m), and  $D$  = the diffusion coefficient of Fe. Experimental data suggest that  $D$  should vary as a function of composition and temperature (85). Here, we obtain a value of  $D_{\text{Fe}}$  from extrapolations based on basaltic compositions in air to  $2173$  K with an  $\text{SiO}_2$  mole fraction of 0.4 for the peridotite liquid, yielding  $\log D_{\text{Fe}} -6.73$  (ref. (86); their eq. 86). Based on these models, full equilibration is achieved in  $\sim 6$  s. However, our measurement times were counted from pyrometer temperatures measured at the surface of the bead, and hence the interior would have required longer timescales to reach the temperature measured at the surface. This thermal equilibration time, given the higher  $\text{Fe}^{3+}/\Sigma\text{Fe}$  of sample Per-TS1, was likely of the order of 5 – 10 s. Once this temperature was reached throughout the bead, and considering that convection is also likely to play a role in melt homogenisation, sample run times  $> 15$  s are sufficiently long to ensure complete equilibration of the melt with the imposed gas mixture.

#### 4. Thermodynamic treatment of Fe<sup>2+</sup>/Fe<sup>3+</sup> as a function of oxygen fugacity

The fugacity of any given gas species is traditionally reported relative to the standard state of the pure ideal gas at 1 bar and the temperature of interest. When defined relative to this standard state, numerical values of  $f_{O_2}$  can change with temperature, for example in a silicate melt of constant composition including constant Fe<sup>3+</sup>/Fe<sup>2+</sup>, or in a H-C-N-O gas phase of constant composition. Therefore such numerical values of  $f_{O_2}$  are meaningless unless the temperature is specified. To avoid this complication, it is customary to switch to a standard state defined by a simple univariant equilibrium. Here we use for the standard state the equilibrium  $2 Fe + O_2 = 2 FeO$ , for which  $\Delta G^\circ$  (J/mol) =  $488236 - 231.118 T + 16.948 T \ln(T)$ , where  $T$  is in K, from ref. (87). These thermochemical data are for solid Fe metal but liquid FeO, and, following common usage, is abbreviated IW (for Iron – Wüstite, the latter being the mineral name for crystalline Fe<sub>1-x</sub>O). Hence  $\log_{10}f_{O_2}(IW) = -\Delta G^\circ/2.303RT$ . Oxygen fugacity relative to the IW standard state are reported as  $\Delta IW$ , where  $\Delta IW = \log_{10}f_{O_2}(O_2 \text{ standard state}) - \log_{10}f_{O_2}(IW)$ . It is found empirically that values of  $\Delta IW$  do not change greatly with temperature in condensed systems of fixed composition, at least under conditions relevant to magmatic processes.

At 2173 K, we obtain a value for the IW buffer of  $\log f_{O_2} = -6.47$ . This compares with  $\log f_{O_2}$  of -5.99 using our experimental calibration,  $\log(Fe^{3+}/Fe^{2+}) = 0.252 \times \log f_{O_2} + 0.096$  for an  $Fe^{3+}/Fe^{2+} = 0.0384$  ( $Fe^{3+}/\Sigma Fe = 0.037$ ). Hence, the terrestrial mantle's  $Fe^{3+}/\Sigma Fe$ , were it to exist with the same ratio in liquid form, relates to an oxygen fugacity of  $\Delta IW + 0.48$ .

In order to understand the solution behaviour of iron in peridotite melts, we relate the free energy of reaction of the FeO and FeO<sub>1.5</sub> components in the melt to that of their pure oxides. For the redox reaction in the silicate melt, we can write:

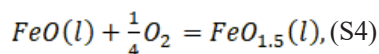

and for the reaction among pure oxides:

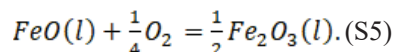

Thermodynamic data for the Gibbs free energy of formation of the pure oxides from the elements can be found in the JANAF (44) and IVTAN (88) databases, and are shown in Table S5, below. In these databases, O<sub>2</sub>(g) is defined as the reference state for oxygen, and has  $\Delta G^\circ_f = 0$  for all temperatures.

**Table S5.** Free energies of formation from the elements ( $\Delta G^\circ_f$ ) of iron oxides in kJ/mol.

| Temperature (K) | IVTAN                                |         | JANAF                                |         |
|-----------------|--------------------------------------|---------|--------------------------------------|---------|
|                 | Fe <sub>2</sub> O <sub>3</sub> (l,s) | FeO (l) | Fe <sub>2</sub> O <sub>3</sub> (l,s) | FeO (l) |
| 1700            | -388.65                              | -165.24 | -384.03                              | -163.83 |
| 1800            | -364.26                              | -160.83 | -364.53                              | -159.16 |
| 1900            | -342.77                              | -155.94 | -343.65                              | -153.83 |
| 2000            | -321.81                              | -151.00 | -322.62                              | -148.45 |
| 2100            | -300.93                              | -146.07 | -301.59                              | -143.09 |
| 2200            | -280.13                              | -141.16 | -280.54                              | -137.74 |
| 2300            | -259.40                              | -136.27 | -259.49                              | -132.41 |
| 2400            | -238.73                              | -131.38 | -238.43                              | -127.09 |

*T<sub>m</sub>* (Fe<sub>2</sub>O<sub>3</sub>) = 1812 K  
*Italic* =  $\Delta G^\circ_f$  calculated taking into account latent heat of fusion (eq. S6)



The JANAF tables report only  $\Delta G_f^\circ$  for crystalline  $\text{Fe}_2\text{O}_3$  (hematite), and thus require a correction for the latent heat of fusion, which is performed according to the following relation:

$$\Delta_{fus} G_f^\circ = T_m \Delta_{fus} H_{T_m}^\circ - T \Delta_{fus} H_{T_m}^\circ \quad (\text{S6})$$

We determine the value of  $\Delta_{fus} H_{T_m}^\circ$  by comparing the  $\Delta G_f^\circ$  of the IVTAN and JANAF databases for solid hematite, and find  $\Delta_{fus} H_{T_m}^\circ = 49 \text{ J/molK}$  for  $\text{Fe}_2\text{O}_3$ . This is in perfect agreement with the  $24.5 \text{ J/molK}$  inferred by ref. (38) for  $\text{FeO}_{1.5}$  from the interpolation of data for the heats of fusion of  $\text{AlO}_{1.5}$  and  $\text{CrO}_{1.5}$ .

Through the relation  $\Delta G_r = -RT \ln K$ , we calculate the equilibrium constant of the reaction  $\Delta G_r = 0.5 \times \Delta G_f^\circ(\text{Fe}_2\text{O}_3) - \Delta G_f^\circ(\text{FeO})$  (eq. S5). At 2173 K and 1 bar, we obtain the value for  $\log K_{(\text{JANAF})} = 0.095$  and  $\log K_{(\text{IVTAN})} = 0.009$ . When compared with the  $\log K$  obtained from the experimental data on the basis of the correlation of  $\log f_{\text{O}_2}$  with  $\log(\text{Fe}^{3+}/\text{Fe}^{2+})$  (Fig. 2 of the main text) in quenched peridotite liquid,  $0.096 \pm 0.053$ , we can obtain  $\gamma_{\text{FeO}_{1.5}}/\gamma_{\text{FeO}}$  by the following relation:

$$\frac{\gamma_{\text{FeO}_{1.5}}}{\gamma_{\text{FeO}}} = \frac{\log K_{\text{experiment}}}{\log K_{\text{JANAF/IVTAN}}} \quad (\text{S7})$$

We calculate values of  $1.00 \pm 0.13$  using the JANAF data and  $1.22 \pm 0.15$  using the IVTAN data.

## 5. Determination of the $Fe^{3+}/\Sigma Fe$ of a terrestrial magma ocean

In order to inform models of possible secondary atmospheric compositions to have formed from outgassing of a terrestrial magma ocean, we exploit the present-day estimates for *i*) the mantle's  $Fe^{3+}/\Sigma Fe$  ratio and hence O content, and *ii*) the abundances of the other three major volatile elements, H, C, and N in the Earth's mantle. Specifically, their abundances in Earth's fictive 'primitive mantle' or bulk silicate Earth (BSE) is most pertinent to this question, as it reflected the composition of Earth's mantle prior its differentiation into crust and depleted mantle reservoirs (24, 89).

### *Use of mantle peridotites to determine $Fe^{3+}/Fe^{2+}$ of the magma ocean*

Estimation of  $Fe^{3+}/\Sigma Fe$  in peridotites derives from the weighted sum of  $Fe^{3+}/\Sigma Fe$  of its constituent minerals. The three most comprehensive studies to this end are refs. (40, 90) in xenolith suites and (41) in massif peridotites, in which  $Fe^{3+}$  contents of each of the five relevant mantle minerals (olivine, orthopyroxene, clinopyroxene, spinel and garnet) are determined from  $^{57}Fe$  Mössbauer spectroscopy. Importantly, the 48 samples investigated by these authors cover a range of *i*) temperatures and pressures of equilibration *ii*) tectonic settings, and *iii*) fertility, that permit assessment of the degree to which these factors affect the  $Fe^{3+}/\Sigma Fe$  of the whole rock (Table S6).

**Table S6.** Summary of data presented in refs. (40, 41, 90), showing selected features of whole rock peridotites from various localities and tectonic settings. Element oxides are presented in wt. %, T in °C and P in GPa. Refer to the original papers for methods.

| Sample                        | Rock type                            | Locality    | MgO  | Fe <sub>2</sub> O <sub>3</sub> | FeO  | CaO  | Na <sub>2</sub> O | T    | P   | $Fe^{3+}/\Sigma Fe$ |
|-------------------------------|--------------------------------------|-------------|------|--------------------------------|------|------|-------------------|------|-----|---------------------|
| <i>Xenoliths</i>              |                                      |             |      |                                |      |      |                   |      |     |                     |
| <i>Massif Central</i>         |                                      |             |      |                                |      |      |                   |      |     |                     |
| Fr1                           | spinel lherzolite                    | Landoz      | 37.5 | 0.30                           | 7.56 | 3.64 |                   |      |     | 0.034               |
| <i>Southeastern Australia</i> |                                      |             |      |                                |      |      |                   |      |     |                     |
| 84-402                        | spinel lherzolite, equigranular      | Pomdon      | 44.5 | 0.17                           | 7.8  | 0.87 |                   | 998  | 1.5 | 0.019               |
| 85-168                        | sp lherzolite, granoblastic tabular  | Leura       | 42.4 | 0.20                           | 9.8  | 1.20 |                   | 1121 | 1.5 | 0.018               |
| 2905                          | sp lherzolite, protogranular tabular | Noorat      | 39.8 | 0.19                           | 7.6  | 2.84 |                   | 963  | 1.5 | 0.022               |
| 84-413                        | phlog. Wehrlite, secondary recryst   | Noorat      | 36.1 | 0.41                           | 8.5  | 2.60 |                   | 874  | 1.5 | 0.042               |
| BM134                         | amp-sp lherzolite, porphyroclastic   | Bullenmeri  | 44.4 | 0.13                           | 8.8  | 1.22 |                   | 908  | 1.5 | 0.013               |
| 84-438                        | phlog. Wehrlite, porphyroclastic     | Shadwell    | 39.8 | 0.42                           | 8.5  | 3.71 |                   |      |     | 0.043               |
| <i>Tanzania</i>               |                                      |             |      |                                |      |      |                   |      |     |                     |
| 89-661                        | garnet lherzolite, coarse            | Lashaine    | 48.1 | 0.07                           | 6.8  | 0.94 |                   | 1090 | 4.5 | 0.009               |
| 89-669                        | wehrlite, protogranular              | Lashaine    | 43.7 | 0.09                           | 9.5  | 1.75 |                   |      |     |                     |
| 89-680                        | garnet harzburgite, coarse           | Lashaine    | 45.9 | 0.14                           | 6.6  | 0.81 |                   | 1150 | 4.2 | 0.019               |
| 89-719                        | garnet harzburgite, coarse           | Lashaine    | 47.7 | 0.07                           | 6.8  | 0.55 |                   | 1164 | 5.2 | 0.009               |
| 89-772                        | dunite, protogranular                | Olmani      | 46.1 | 0.039                          | 12.5 | 0.66 |                   | 1120 | 2   | 0.003               |
| 89-773                        | harzburgite, protogranular           | Olmani      | 49.1 | 0.09                           | 5.97 | 0.11 |                   | 1080 | 2   | 0.013               |
| 89-777                        | wehrlite, protogranular              | Olmani      | 48.2 | 0.07                           | 8.5  | 1.36 |                   |      |     | 0.007               |
| <i>Southern Africa</i>        |                                      |             |      |                                |      |      |                   |      |     |                     |
| BD1140                        | garnet lherzolite, coarse, low T     | Bultfontein | 41.8 | 0.18                           | 7.3  | 1.75 |                   | 975  | 5   | 0.022               |
| BD1150                        | garnet lherzolite, coarse, low T     | Bultfontein | 37.6 | 0.39                           | 7.1  | 3.49 |                   | 1141 | 7   | 0.047               |
| BD1201                        | garnet lherzolite, coarse, low T     | Wesselton   | 42.2 | 0.23                           | 6.8  | 1.33 |                   | 1007 | 6.3 | 0.030               |
| BD1354                        | garnet websterite, coarse, low T     | Matsoku     | 29.3 | 0.77                           | 11.2 | 4.38 |                   | 1294 | 9   | 0.058               |
| F865                          | garnet harzburgite, w/diamond        | Finsch      | 44.7 | 0.09                           | 6.8  | 0.56 |                   |      |     | 0.012               |
| F556                          | garnet harzburgite, w/diamond        | Finsch      | 40.7 | 0.16                           | 9.2  | 0.96 |                   |      |     | 0.015               |
| FRB921                        | garnet websterite, coarse, low T     | Premier     | 35.7 | 0.31                           | 6.14 | 3.01 |                   | 1055 | 4.2 | 0.043               |
| FRB1350                       | sp-gt lherzolite, w/graphite         | Premier     | 42.6 | 0.14                           | 6.8  | 1.43 |                   | 722  | 2.5 | 0.018               |
| PHN5267                       | garnet lherzolite, sheared, high T   | Premier     | 43.0 | 0.21                           | 7.51 | 2.01 |                   |      |     | 0.025               |
| FRB909                        | garnet lherzolite, sheared, high T   | Premier     | 42.1 | 0.21                           | 8.1  | 1.63 |                   | 1395 | 6.2 | 0.023               |

|                           |                                    |               |       |       |     |      |      |     |       |
|---------------------------|------------------------------------|---------------|-------|-------|-----|------|------|-----|-------|
| PHN5239                   | garnet lherzolite, sheared, high T | Premier       | 44.2  | 0.17  | 7.2 | 0.90 | 1431 | 7.1 | 0.021 |
| <i>Siberia</i>            |                                    |               |       |       |     |      |      |     |       |
| UV417/89                  | garnet lherzolite, coarse, low T   | Udachnaya     | 39.2  | 0.21  | 8.3 | 2.93 | 881  | 6.4 | 0.022 |
| UV61/91                   | garnet lherzolite, sheared, high T | Udachnaya     | 44.6  | 0.14  | 7.3 | 1.68 | 1239 | 7.8 | 0.017 |
| <i>Massif Peridotites</i> |                                    |               |       |       |     |      |      |     |       |
| <i>Beni Bousera</i>       |                                    |               |       |       |     |      |      |     |       |
| bbI-32e                   | spinel lherzolite                  |               | 39.31 | 0.145 |     |      | 947  | 1.5 |       |
| bbI-36                    | spinel harzburgite                 |               | 45.23 | 0.04  |     |      | 920  | 1.5 |       |
| bbI-37a                   | spinel lherzolite                  |               | 41.35 | 0.137 |     |      | 950  | 1.5 |       |
| bbI-37b                   | spinel lherzolite                  |               | 41.35 | 0.130 |     |      | 950  | 1.5 |       |
| bbI-43                    | spinel lherzolite                  |               | 39.89 | 0.184 |     |      | 1110 | 1.5 |       |
| bbII-13                   | spinel lherzolite                  |               | 39.20 | 0.077 |     |      | 1137 | 1.5 |       |
| bbII-14                   | spinel lherzolite                  |               | 44.73 | 0.034 |     |      | 1084 | 1.5 |       |
| bbIV-11                   | spinel harzburgite                 |               | 46.22 | 0.084 |     |      | 930  | 1.5 |       |
| <i>Ronda</i>              |                                    |               |       |       |     |      |      |     |       |
| E3-126a                   | spinel lherzolite                  |               | 44.59 | 0.051 |     |      | 915  | 1.5 |       |
| E3-126b                   | spinel lherzolite                  |               | 44.59 | 0.054 |     |      | 915  | 1.5 |       |
| E3-208a                   | plagioclase lherzolite             |               | 42.24 | 0.088 |     |      | 929  | 1   |       |
| E3-208b                   | plagioclase lherzolite             |               | 42.24 | 0.098 |     |      | 929  | 1   |       |
| E3-227                    | spinel lherzolite                  |               | 44.20 | 0.117 |     |      | 935  | 1.5 |       |
| E3-144                    | spinel lherzolite                  |               | 39.07 | 0.224 |     |      | 948  | 1.5 |       |
| E3-148                    | spinel lherzolite                  |               | 38.60 | 0.165 |     |      | 987  | 1.5 |       |
| <i>Pyrenees</i>           |                                    |               |       |       |     |      |      |     |       |
| Py-1                      | spinel lherzolite                  | Fontête Rouge | 40.39 | 0.190 |     |      | 958  | 1.5 |       |
| Py-18                     | apatite-bearing sp lherzolite      | Lherz         | 40.49 | 0.263 |     |      | 986  | 1.5 |       |
| Py-30a                    | spinel lherzolite                  | Lherz         | 40.28 | 0.197 |     |      | 833  | 1.5 |       |
| Py-30b                    | spinel lherzolite                  | Lherz         | 40.28 | 0.198 |     |      | 833  | 1.5 |       |
| Py-34                     | spinel lherzolite                  | Lherz         | 39.74 | 0.220 |     |      | 903  | 1.5 |       |
| Py-25                     | amphibole-bearing sp lherzolite    | Caussou       | 40.71 | 0.279 |     |      | 849  | 1.5 |       |

From Fig. S7a, b, it is clear that there is no dependence of  $Fe^{3+}/\sum Fe$  on either the temperature or pressure of equilibration, a conclusion that holds irrespective of whether the aluminous phase is spinel ( $P \sim 1.5$  GPa) or garnet ( $P > 2$  GPa). This is also true of samples that have similar chemical composition and equilibration temperature, such as sample 84-402 with  $T$  ( $^{\circ}C$ ) = 998 and  $P$  (GPa) = 1.5, a spinel lherzolite with 44.5 wt. % MgO from Southeastern Australia and sample UV61/91 with  $T$  ( $^{\circ}C$ ) = 1239 and  $P$  (GPa) = 7.8, a sheared garnet lherzolite with 44.6 wt. % MgO from Udachnaya, Siberian craton. The former sample has  $Fe^{3+}/\sum Fe$  of 0.019, whereas the latter has 0.017. The effect of temperature is difficult to isolate, as many continental xenoliths fall along geotherms with similar temperature gradients of  $\sim 40$  mW/m<sup>2</sup>. Nevertheless, the sample FRB1350, a spinel-garnet lherzolite containing graphite from the Kaapvaal craton, with an equilibration temperature of 722  $^{\circ}C$  and a pressure of 2.5 GPa, and an MgO content of 42.6 wt. % has  $Fe^{3+}/\sum Fe$  of 0.018. This  $Fe^{3+}/\sum Fe$  is identical to that of a spinel lherzolite from Southeastern Australia, 85-168, with  $T = 1121$   $^{\circ}C$ ,  $P = 1.5$  GPa and MgO = 42.4 wt. %. It should also be noted that these xenoliths come from rather different tectonic settings; from the stable Archean shields of the Kaapvaal (FRB1350) and Siberian (UV61/91) cratons (91) and from the Tertiary Newer Volcanic Province erupting above lithosphere of accreted Phanerozoic arc terranes (85-168 and 84-402) (92).

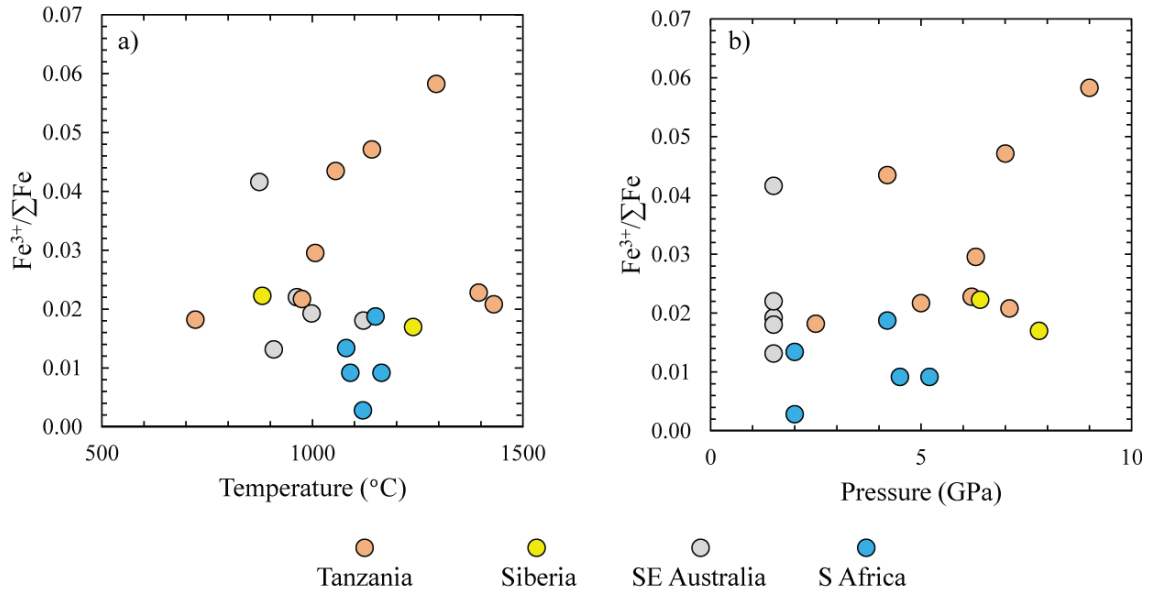

**Fig. S7. Variation of  $\text{Fe}^{3+}/\Sigma\text{Fe}$  of natural peridotite xenoliths with temperature and pressure.** Data of refs. (40, 41, 90) illustrating the variation of  $\text{Fe}^{3+}/\Sigma\text{Fe}$  in whole rock peridotites determined by measurements of individual minerals via Mössbauer spectroscopy with **a)** Temperature ( $^{\circ}\text{C}$ ) and **b)** Pressure (GPa). Samples are colour-coded according to their locality.

The observation that, for a given bulk composition, the temperature and pressure of equilibration (and tectonic setting) have no discernible effect on the  $\text{Fe}^{3+}/\Sigma\text{Fe}$  is crucial in establishing the insensitivity of the ratio to any potential redox exchange with other multivalent species (Cr, H, C, and S, in particular). This suggests that either *i*) the oxygen fugacities of samples in the upper mantle are such that redox reactions between other multivalent species do not occur (i.e., the equilibrium constant of the reaction  $\text{H}_2\text{O} = \text{H}_2 + \frac{1}{2}\text{O}_2$  at mantle  $f\text{O}_2$ s always has high  $\text{H}_2\text{O}/\text{H}_2$  ratios) or that *ii*) any small change in the ratios of other redox-sensitive species (e.g.  $\text{H}_2\text{O}/\text{H}_2$ ,  $\text{Cr}_2\text{O}_3/\text{CrO}$ ,  $\text{CO}_2/\text{C}$ ) is buffered by  $\text{Fe}^{3+}/\text{Fe}^{2+}$  (cf. ref. (40)). On the basis of these observations,  $\text{Fe}^{3+}/\Sigma\text{Fe}$  can be taken as a faithful record of the oxygen content of peridotite.

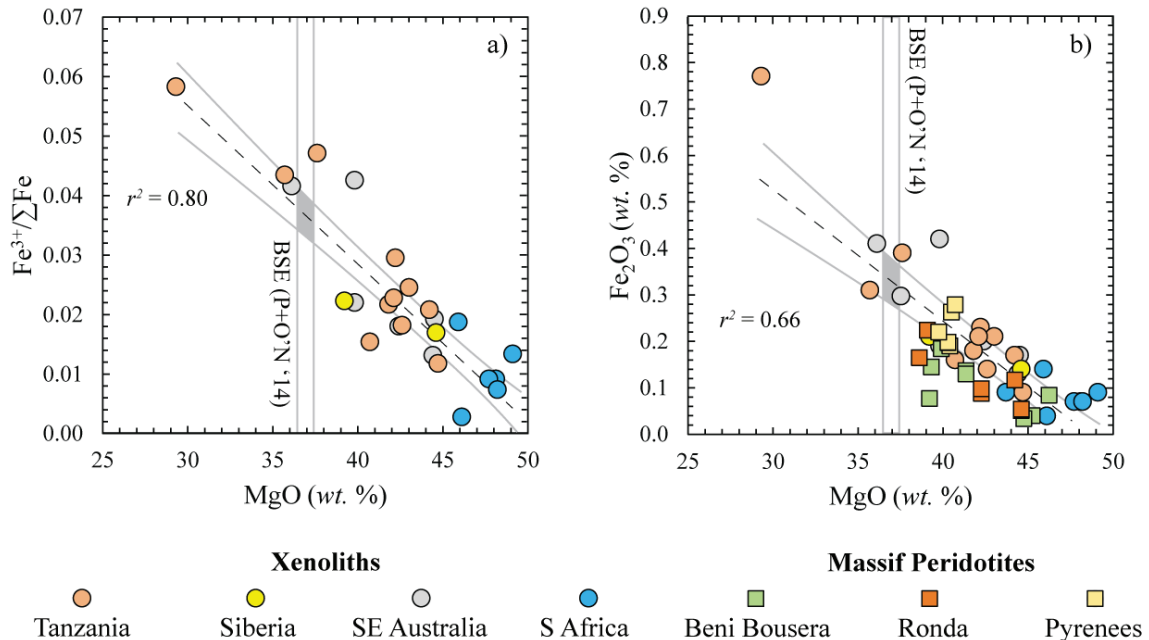

**Xenoliths**  
 Tanzania (orange), Siberia (yellow), SE Australia (grey), S Africa (blue)

**Massif Peridotites**  
 Beni Bousera (green), Ronda (red), Pyrenees (yellow)

**Fig. S8. The variation of a)  $\text{Fe}^{3+}/\Sigma\text{Fe}$  and b)  $\text{Fe}_2\text{O}_3$  (wt. %) with MgO (wt. %) in whole rock peridotites.** Shown is the line of best fit (dashed black line) and its 95 % confidence envelope (grey curves). The MgO content of the BSE (24) is shown as a range demarcated by the grey vertical lines. The area of intersection gives the mean value and uncertainty thereof of the  $\text{Fe}^{3+}/\Sigma\text{Fe}$  of the BSE (grey area). Data from refs. (40, 41, 90), see Table S6.

Examination of the dataset presented in Table S6 shows that  $\text{Fe}^{3+}/\Sigma\text{Fe}$  covaries with indices of melt extraction; namely, the abundances of MgO, CaO and  $\text{Na}_2\text{O}$  in the peridotite whole rock (Fig. S8). Correlations with each of the element oxides defines an  $r^2 \sim 0.6$  for the 20 pristine samples, with  $\text{Fe}^{3+}/\Sigma\text{Fe}$  decreasing as the amount of basaltic component in the rock decreases (40, 90). Partial melting of the mantle produces melts with a higher  $\text{Fe}^{3+}/\Sigma\text{Fe}$  ratio than in their source peridotite, due to the high contribution of clinopyroxene and spinel to the melting reactions at low pressures (93, 94) and the higher incompatibility of  $\text{Fe}^{3+}$  relative to  $\text{Fe}^{2+}$  in mantle minerals (71). By mass balance, therefore,  $\text{Fe}^{3+}/\Sigma\text{Fe}$  in the residuum must decrease. These correlations can then be used to calculate the  $\text{Fe}^{3+}/\Sigma\text{Fe}$  of a fictive BSE composition, and yield, based on MgO,  $\text{Fe}^{3+}/\Sigma\text{Fe} = 0.035$ , for CaO,  $\text{Fe}^{3+}/\Sigma\text{Fe} = 0.036$  and for  $\text{Na}_2\text{O}$ ,  $\text{Fe}^{3+}/\Sigma\text{Fe} = 0.036$ , and hence an average of  $0.036 \pm 0.001$ ,  $n = 20$ . As all samples lie on the same trend, we use the entire dataset of ref. (40) to derive the relationship:

$$\frac{\text{Fe}^{3+}}{\Sigma\text{Fe}} (\%) = 13.7 \pm 1.1 - 0.27 \pm 0.03 \times \text{MgO (wt. \%)}; r^2 = 0.80, n = 26 \quad (\text{S8})$$

At the MgO content of the BSE,  $36.77 \pm 0.44$  wt. % (24), eq. (S10) gives  $\text{Fe}^{3+}/\Sigma\text{Fe}$  of  $0.037 \pm 0.005$ , propagating errors on both the BSE MgO content and the 95 % confidence interval on the regression (Fig. S8).

With the inclusion of massif peridotite samples (41) allows for derivation of the relationship:

$$\text{Fe}_2\text{O}_3 \text{ (wt. \%)} = 1.37 \pm 0.13 - 0.028 \pm 0.003 \times \text{MgO (wt. \%)}; r^2 = 0.66, n = 48 \quad (\text{S9})$$

Which, despite the greater number of samples, has a lower correlation coefficient. At the MgO content of the BSE, this expression yields  $\text{Fe}_2\text{O}_3$  (wt. %) =  $0.33 \pm 0.06$ . Given the well-known value of the FeO content of the BSE,  $8.1 \pm 0.1$  wt. %, this translates into an  $\text{Fe}^{3+}/\Sigma\text{Fe}$  of  $0.037 \pm 0.007$ , consistent with estimates from eq. (S8).

*Use of Mid-Ocean Ridge Basalt (MORB) glasses to constrain the  $\text{Fe}^{3+}/\text{Fe}^{2+}$  of their mantle sources*

The  $\text{Fe}^{3+}/\Sigma\text{Fe}$  ratios of MORB glasses have been determined by XANES spectroscopy (31) with results that are in agreement with previous wet-chemical determinations (51). The mean  $\text{Fe}^{3+}/\Sigma\text{Fe}$  value is 0.11 and shows a weak negative correlation with the MgO content of the glass (39). Because MORB glasses have evolved from their parental magmas (*i.e.*, they have Mg#s lower than that expected for equilibrium with  $\text{Fo}_{90}$  olivine, their  $\text{Fe}^{3+}/\Sigma\text{Fe}$  ratios cannot be directly be used to determine those of their mantle sources. Assuming the ‘Replenish-Fractionate-Tap’ model of MORB genesis gives a parental melt at 10.4 wt. % MgO with  $0.61 \pm$  wt. %  $\text{Fe}_2\text{O}_3$  (39) (their Fig. 1). Alternatively, an empirical extrapolation to calculate their  $\text{Fe}_2\text{O}_3$  contents at a melt Mg# of 0.72, yields values of  $0.73 \pm 0.18$  wt. % (31).

The corresponding  $\text{Fe}_2\text{O}_3$  content of the mantle source can then be estimated by applying the non-modal batch melting equation, a fair approximation to the physically more realistic polybaric accumulated fractional melting. The equation for batch melting is

$$C_o = C_l(D + F(1 - P)) \quad (\text{S10})$$

where  $C_o$  and  $C_l$  are the concentrations of  $\text{Fe}_2\text{O}_3$  in the source, and liquid, respectively,  $D$  is its bulk partition coefficient between solid and liquid, equated at each melt fraction  $F$ . Here, the non-modality of melting is applied by adopting  $P$  according to the measured values as a function of  $F$  from (39), yielding  $C_o/C_l = 2.9$  at  $F = 0.2$ , giving  $C_o = 0.21 \pm 0.06$  or  $0.25 \pm 0.06$  wt. %  $\text{Fe}_2\text{O}_3$ .

Assuming the mantle source of MORB contains 8.1 wt. % FeO<sup>(T)</sup> (95), these Fe<sub>2</sub>O<sub>3</sub> contents imply Fe<sup>3+</sup>/ΣFe ratios of 0.028±0.007. For the ‘Replenish-Tap-Fractionate’ model of MORB genesis and the data of (31), a value of 0.21±0.06 wt. % Fe<sub>2</sub>O<sub>3</sub> in the MORB source was estimated (39), yielding Fe<sup>3+</sup>/ΣFe = 0.023±0.006. Because the MORB source mantle, on the basis of its trace element composition, is residual following ~3 – 5 % melt extraction (95), these Fe<sup>3+</sup>/ΣFe are minimum estimates. Because of their agreement with direct measurements of Fe<sup>3+</sup>/ΣFe in peridotites, whose composition enables determination of that in the BSE, we adopt Fe<sup>3+</sup>/ΣFe = 0.037±0.005 as the nominal value of the terrestrial magma ocean.

## 6. Thermodynamic models of atmospheric composition

Use of the contemporary BSE abundances to calculate a primitive atmosphere implies that the Earth had already attained in present-day complement of H, C, N, and O by the time of the giant impact. By contrast, should the late veneer, thought to represent ~0.5 wt. % of the Earth’s mass, have delivered the bulk of the Earth’s volatile budget (4), then the post giant-impact magma ocean would have contained fewer volatiles, and likely in different ratios, than exist in the BSE today. However, due to the contrasting identities invoked for the chondritic meteoritic material (4, 70, 96) thought to have comprised the late veneer, back-calculating the volatile composition of a terrestrial magma ocean is uncertain. As such, while the equivalence of the present-day BSE volatile budget with that of the early Earth cannot be conclusively demonstrated, it remains our strongest constraint as to the composition of the Hadean Earth.

Recent estimates for the composition of the BSE converge relatively well upon the abundances of H, C and N (Table S7).

**Table S7:** Recent estimates of the abundances (in mass %) of the major volatiles H, C and N in the bulk silicate Earth (BSE), and their associated H/C and H/N ratios by mass and by moles.

|                            | BSE (24)      | BSE (53)        |
|----------------------------|---------------|-----------------|
| <i>Abundances (mass %)</i> |               |                 |
| H                          | 0.0120±0.0024 | 0.0079±0.0010   |
| C                          | 0.0100±0.0050 | 0.014±0.004     |
| N                          | 0.0002±0.0001 | 0.00028±0.00006 |
| <i>Ratios</i>              |               |                 |
| H/C (mass)                 | 1.2           | 0.56            |
| H/C (moles)                | 14.4          | 6.76            |
| H/N (mass)                 | 60            | 28.2            |
| H/N (moles)                | 840           | 395             |

Should the magma ocean quantitatively degas its entire H, C, and N budget, it would produce partial pressures (in bar) of  $p_{\text{H}_2\text{O}} = 832.6$ ,  $p_{\text{CO}_2} = 282.7$  and  $p_{\text{N}_2} = 1.54$  for the BSE estimates of ref. (24), and  $p_{\text{H}_2\text{O}} = 547.4$ ,  $p_{\text{CO}_2} = 395.8$  and  $p_{\text{N}_2} = 2.16$  for the more recent model of ref. (53). In both cases, however, H would be expected to be the dominant component, both by moles and by mass, in a terrestrial atmosphere, with N<sub>2</sub> contributing only as a minor component, at most ~2 bar of pressure. These estimates, however, assume negligible solubility of these elements in a silicate (i.e., peridotitic) magma ocean. In practice, each of these elements are soluble to varying degrees in silicate liquid and hence their associated partial pressures in the atmosphere will decrease accordingly.

Solubility laws depend on the speciation of the element in question, both in the liquid silicate and in the gaseous phase (8, 56). The oxygen fugacity of the magma ocean as constrained by Fe<sup>3+</sup>/ΣFe of natural peridotites, combined with that determined by XANES spectroscopy of peridotite liquids, is equal to ΔIW+0.5. These mildly oxidising conditions allow some simplifying assumptions to be made as to the speciation of H, C and N in silicate melts. Ref. (97) showed that dissolved H<sub>2</sub> in basaltic silicate melts in equilibrium with a vapour phase with  $f_{\text{H}_2}$  between 166 and 68163 bar only becomes

important at oxygen fugacities below IW. By the same token, ref. (57) found evidence for the occurrence of Fe(CO)<sub>5</sub> and minor CH<sub>4</sub> in silicate melts of a lunar basaltic composition, but only at, or below, ΔIW-0.55. In a study of the solubility of N in silicate melts, dissolved N<sub>2</sub> was shown to be stable in a basaltic melt composition over a wide range of *f*O<sub>2</sub>, down to the IW buffer (56).

Therefore, we presume that H dissolves as molecular H<sub>2</sub>O and partially dissociates to OH in silicate melts (58):

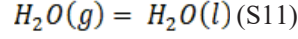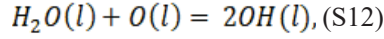

Because of the highly depolymerised melt composition, C is incorporated exclusively as the CO<sub>3</sub><sup>2-</sup> anion (98):

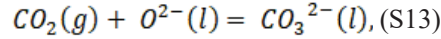

and N is dissolved as molecular N<sub>2</sub> (56):

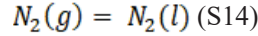

The solubility of these elements in peridotite liquid can be estimated using expressions for the solubility of CO<sub>3</sub><sup>2-</sup>, H<sub>2</sub>O and N<sub>2</sub> in basaltic melts. There are, however, two caveats to be mindful of, *i*) existing calibrations are performed over a limited temperature range (800 ≤ T °C ≤ 1400 °C) and *ii*) the compositions do not reflect those of a peridotite liquid. As such, extrapolation of existing solubility laws to the conditions of the magma ocean, at 2173 K for a peridotite liquid, should be treated with caution. Nevertheless, there are features of the behaviour of H<sub>2</sub>O and CO<sub>3</sub><sup>2-</sup> in basaltic liquids evident from existing data that suggest these laws should provide a good estimate of their solubility in peridotite liquids. First, the temperature dependence of their solubilities has been shown to be weak (H<sub>2</sub>O; (99)) or undetectable within experimental uncertainty (CO<sub>3</sub><sup>2-</sup>; (100)). Furthermore, in the expression of (54) used to calculate water solubility, coefficients that take into account the mole fractions of the liquid oxides are included in order to account for the effect of composition of the silicate melt on H<sub>2</sub>O solubility.

With these considerations in mind, the solubility of H<sub>2</sub>O in peridotite liquid is calculated by (54):

$$2 \ln X_{H_2O}^{melt} = \frac{a}{T} + \sum_i b_i X_i \left( \frac{P}{T} \right) + c \ln f_{H_2O}^{fluid} + d \text{ (S14)}$$

where  $X_{H_2O}^{melt}$  and  $f_{H_2O}^{fluid}$  are the mole fraction and fugacity of water in the melt and fluid, respectively,  $a = 2565$ ,  $b_{Al_2O_3} = -1.997$ ,  $b_{FeO(T)} = -0.9275$ ,  $b_{Na_2O} = 2.376$ ,  $X_i$  refers to the oxide mole fraction,  $c = 1.171$ ,  $d = -14.21$ ,  $P$  is the total pressure in bars and  $T$  the temperature in Kelvin. We set  $X_{FeO(T)} = 0.08$ ,  $X_{Na_2O} = 0$  and  $X_{Al_2O_3} = 0.04$ .

The solubility of CO<sub>3</sub><sup>2-</sup> in peridotite liquid is calculated following the model of (55):

$$X_{CO_3^{2-}}^{melt}(P, T) = X_{CO_3^{2-}}^{melt}(P_0, T_0) \frac{f_{CO_2}^{gas}(P, T_0)}{f_{CO_2}^{gas}(P_0, T_0)} \exp \left\{ \frac{-\Delta V_r^{o,melt}(P-P_0)}{RT_0} \right\} \text{ (S15)}$$

where  $R$  is the gas constant,  $\Delta V_r^{o,melt} = (V_{CO_3^{2-}}^{o,melt}) - (V_{O^{2-}}^{o,melt})$  and  $V_{CO_3^{2-}}^{o,melt}$  and  $V_{O^{2-}}^{o,melt}$  are the standard molar volumes of CO<sub>3</sub><sup>2-</sup> and O<sup>2-</sup> in the silicate melt that are assumed to be independent of  $P$  and  $T$  over the range considered. Setting  $P_0$  to 1 bar and  $T_0 = 1473$  K, and  $\Delta V_r^{o,melt} = 23$  cm<sup>3</sup>/mol the best fit value of  $X_{CO_3^{2-}}^{melt} = 3.8 \times 10^{-7}$  or ~0.5 ppm (55).

The solubility of nitrogen as  $N_2$  is the lowest of the three elements, and, above the IW buffer, is simply given according to Henry's law (56):

$$N^{melt} \text{ (ppm)} = f_{N_2}^{gas} (0.0611 \pm 0.0149). \text{ (S16)}$$

where  $N^{melt}$  is the concentration of nitrogen in the melt in parts per million.

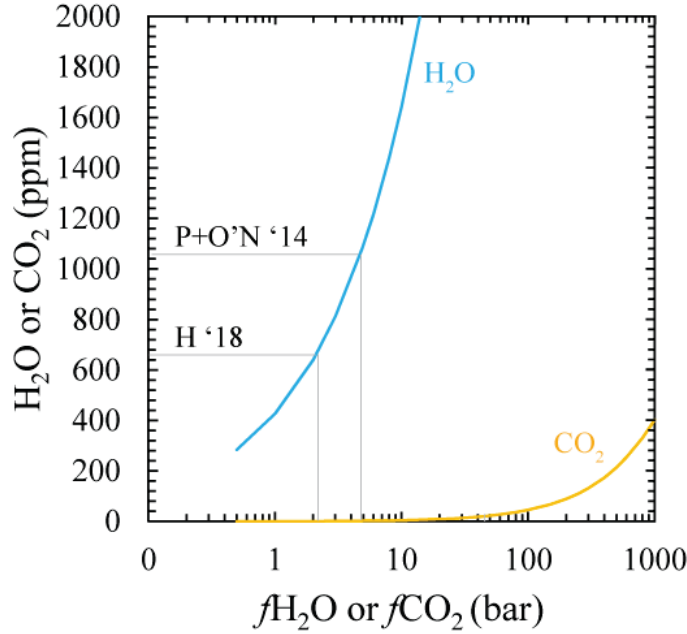

**Fig. S9. Solubilities of  $H_2O$  and  $CO_2$  in a terrestrial magma ocean.** The solubility (in ppm) of  $H_2O$  (blue) and  $CO_2$  (yellow) in a silicate melt of peridotite composition at 2173 K as a function of  $fH_2O$  and  $fCO_2$  as calculated by the equations of refs. (54) and (55), respectively. The grey lines represent the BSE estimates of  $H_2O$  according to (53) (H '18) and (24) (P+O'N '14), predicting  $fH_2O$  of ~2.5 bar and 5 bar, respectively. Conversely, the  $fCO_2$  calculated for a fully-degassing magma ocean of 62.5 bar and 41 bar yields 28.3 (ref. (53)) and 20.3 (ref. (24)) ppm  $CO_2$  in the magma ocean. All fugacities by mass.

The  $H_2O$  solubility in the magma ocean is given by the point at which the BSE content of  $H_2O$  (Table S7) crosses the solubility curve defined by eq. S14 (Fig. S9). This occurs at only 2.5 bar  $H_2O$  for the composition of (53), and 5 bar for the composition of (24). At an  $fO_2$  of  $\Delta IW+0.5$ , the  $H_2O/H_2$  ratio is calculated according to the following equation:

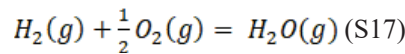

With a  $\log K$  of reaction at 2173 K of 3.21 assuming an ideal gas (43). This yields 0.2 bar of  $H_2$  for 2.5 bar  $H_2O$  and 0.4 bar of  $H_2$  for 5 bar  $H_2O$  (by mass). This equates to between 99.6 % and 99.4 % of the  $H_2O$  budget of the BSE being stored in the magma ocean. The final pressures of  $\sum f(H_2O_x; x = 0 \text{ or } 1)$  are therefore between 2.7 and 5.4 bar (by mass).

For C, at  $\Delta IW+0.5$ , the gas phase is predicted to have  $fCO/fCO_2 \sim 3.5$ , according to the reaction:

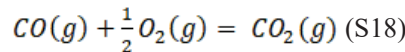

for which the  $\log K$  is calculated to be 2.30 at 2173 K (43). Hence,  $fCO_2$  is significantly lower than  $\sum f(CO_x; x = 1 \text{ or } 2)$ . In this case, it is assumed that the oxygen buffering capacity of the mantle far exceeds that of the atmosphere, such that the atmospheric  $fCO/fCO_2$  is fixed at 3.5 (or 4.8 by moles).



For an initial C abundance of 0.014 % in the BSE, 62.5 bar of CO<sub>2</sub> and 221.1 bar of CO are present in a fully-degassed atmosphere of ref. (53) at ΔIW+0.5. This is equivalent to 287 ppm of CO and 81 ppm of CO<sub>2</sub> in the magma ocean. An  $f_{\text{CO}_2} = 62.5$  bar, eq. S15 predicts a CO<sub>2</sub> solubility in the magma ocean of 28.3 ppm, or 35% of the CO<sub>2</sub> budget. In order to maintain  $f_{\text{CO}}/f_{\text{CO}_2} = 3.5$ , it must also dissolve an appropriate amount of CO (though its speciation in the magma ocean is CO<sub>3</sub><sup>2-</sup> given the excess buffering capacity of oxygen). There is some equilibrium amount of CO (likely in the form Fe(CO)<sub>5</sub> (57)) below ΔIW-0.55, but this is not considered here. This results in a final pressure of CO = 144 bar and CO<sub>2</sub> = 41 bar (by mass). An equivalent calculation for the BSE composition of ref. (24) yields 102.5 bar CO and 29 bar CO<sub>2</sub> (by mass).

For 2.16 bar of N<sub>2</sub>, eq. S16 predicts an N content of the magma ocean of 0.13 ppm, or 5% of the total N budget. This quantity is smaller than the uncertainty in the abundance of N in the BSE (±0.6 ppm (53)), and so it is assumed that N<sub>2</sub> is present entirely in the atmosphere at  $f_{\text{N}_2}$  of 2.16 bar (53) or 1.56 bar (24).

The resultant total pressures in an atmosphere in equilibrium with a magma ocean at 2173 K are 138.5 bar with the BSE of (24), and 189.5 bar for the BSE composition of (53). The molar H/C and H/N ratios are 0.23 and 6.79 for the model of (24) and 0.07 and 2.25 using the BSE abundances of (53)

#### *FactSage Atmosphere model*

With this information, the speciation of a model magma ocean atmosphere with molar H/C and H/N combining the estimates of (24, 53) estimates and a total pressure of 140 bar can be calculated using FactSage. The moles of all species are normalised to H = 1, yielding C = 4.3 and N = 0.17. The moles of O are adjusted such that the  $f_{\text{O}_2}$  gives a value equivalent to ΔIW+0.5 at 2173 K (10<sup>-6</sup> bar), and, for this composition, is found to be 5.3. The initial total pressure is set to 140 bar, to reflect the sum of the CO, CO<sub>2</sub>, H<sub>2</sub>, H<sub>2</sub>O and N<sub>2</sub> species predicted to be present at 2173 K. The speciation and fugacities of the stable gas species, along with any condensed phases, are then calculated by minimising the Gibbs free energy of the system using FactSage 7.3 (61) at a given temperature and pressure. It should be noted that these conditions initially exceed the critical point of H<sub>2</sub>O (647 K and 221 bar) and of mixed CO<sub>2</sub>-H<sub>2</sub>O systems (77).

As our treatment deals only with pure phases (i.e., no real or solid solutions), the calculations are necessarily simplified upon precipitation of graphite and water. Furthermore, the calculations are made so as to approximate a closed system, in which the bulk composition is held constant, and interactions of the atmosphere with the magma ocean, crystalline silicates, or other solids are ignored. As such, reactions of high water vapour pressures with condensed phases to form hydrous minerals, or the dissolution of CO<sub>3</sub><sup>2-</sup> into seawater are not treated and are beyond the scope of this work. Results of these calculations are discussed as Fig. 3 and in the main text.

**Table S8-I.** Fugacities (bar) of species in a real gas calculated according to FactSage simulating closed system cooling of a magma ocean at  $\Delta IW+0.5$  from 2173 K to 273 K with initial molar ratios of H/C = 0.22 and H/N = 5.8. Part I – 2173 K – 1473 K

|                  |         |         |         |         |         |         |         |         |         |         |         |         |         |         |         |
|------------------|---------|---------|---------|---------|---------|---------|---------|---------|---------|---------|---------|---------|---------|---------|---------|
| Temp. (K)        | 2173    | 2123    | 2073    | 2023    | 1973    | 1923    | 1873    | 1823    | 1773    | 1723    | 1673    | 1623    | 1573    | 1523    | 1473    |
| Gas (moles)      | 4.88    | 4.88    | 4.88    | 4.88    | 4.88    | 4.88    | 4.88    | 4.88    | 4.88    | 4.88    | 4.88    | 4.88    | 4.88    | 4.88    | 4.88    |
| CO               | 101.8   | 101.7   | 101.6   | 101.5   | 101.4   | 101.3   | 101.1   | 101.0   | 100.8   | 100.7   | 100.5   | 100.3   | 100.1   | 99.9    | 99.7    |
| CO <sub>2</sub>  | 21.3    | 21.4    | 21.5    | 21.6    | 21.7    | 21.8    | 21.9    | 22.1    | 22.2    | 22.4    | 22.6    | 22.8    | 23.0    | 23.2    | 23.4    |
| H <sub>2</sub> O | 7.3     | 7.2     | 7.1     | 7.0     | 6.9     | 6.8     | 6.7     | 6.5     | 6.4     | 6.3     | 6.0     | 5.9     | 5.7     | 5.4     | 5.2     |
| H <sub>2</sub>   | 6.9     | 7.0     | 7.1     | 7.2     | 7.4     | 7.5     | 7.6     | 7.8     | 7.9     | 8.1     | 8.3     | 8.5     | 8.7     | 8.9     | 9.1     |
| N <sub>2</sub>   | 2.4     | 2.4     | 2.4     | 2.4     | 2.4     | 2.4     | 2.4     | 2.4     | 2.4     | 2.4     | 2.4     | 2.4     | 2.4     | 2.4     | 2.4     |
| O <sub>2</sub>   | 1.0E-06 | 5.1E-07 | 2.4E-07 | 1.1E-07 | 4.8E-08 | 2.0E-08 | 8.1E-08 | 3.1E-09 | 1.1E-09 | 3.8E-10 | 1.2E-10 | 3.5E-11 | 9.7E-12 | 2.2E-12 | 5.2E-13 |
| O                | 2.3E-06 | 1.2E-06 | 5.6E-07 | 2.6E-07 | 1.2E-07 | 5.1E-08 | 2.1E-08 | 8.3E-09 | 3.1E-09 | 1.1E-09 | 3.6E-10 | 1.1E-10 | 3.2E-11 | 8.5E-12 | 2.1E-12 |
| CH <sub>4</sub>  | 3.7E-09 | 5.2E-09 | 7.5E-09 | 1.1E-08 | 1.6E-08 | 2.5E-08 | 4.0E-08 | 6.4E-08 | 1.1E-07 | 1.8E-07 | 3.2E-07 | 5.8E-07 | 1.1E-06 | 2.2E-06 | 4.5E-06 |
| NH <sub>3</sub>  | 3.2E-06 | 3.6E-06 | 3.9E-06 | 4.4E-06 | 4.9E-06 | 5.4E-06 | 6.1E-06 | 6.9E-06 | 7.9E-06 | 9.1E-06 | 1.1E-05 | 1.2E-05 | 1.5E-05 | 1.7E-05 | 2.1E-05 |
| Total P (bar)    | 139.8   | 139.8   | 139.8   | 139.8   | 139.8   | 139.8   | 139.8   | 139.8   | 139.8   | 139.9   | 139.8   | 139.8   | 139.8   | 139.8   | 139.8   |
| Condensed phases |         |         |         |         |         |         |         |         |         |         |         |         |         |         |         |
| Graphite (moles) |         |         |         |         |         |         |         |         |         |         |         |         |         |         |         |
| Graphite (mass)  |         |         |         |         |         |         |         |         |         |         |         |         |         |         |         |
| Water (moles)    |         |         |         |         |         |         |         |         |         |         |         |         |         |         |         |
| Water (mass)     |         |         |         |         |         |         |         |         |         |         |         |         |         |         |         |



**Table S8-III.** Fugacities (bar), in moles, of species in a real gas calculated according to FactSage simulating closed system cooling of a magma ocean at  $\Delta IW+0.5$  from 2173 K to 273 K with initial molar ratios of H/C = 0.22 and H/N = 5.8. Part III – 723 K – 273 K.

|                  |         |         |         |         |         |         |         |         |         |          |
|------------------|---------|---------|---------|---------|---------|---------|---------|---------|---------|----------|
| Temp. (K)        | 723     | 673     | 623     | 573     | 523     | 473     | 423     | 373     | 323     | 273      |
| Gas (moles)      | 3.0611  | 3.0216  | 3.0015  | 2.9919  | 2.9876  | 2.9858  | 2.9852  | 2.985   | 2.8282  | 2.5      |
| CO               | 1.9     | 0.6     | 0.2     | 0.0     | 0.0     | 0.0     | 0.0     | 0.0     | 0.0     | 0.0      |
| CO <sub>2</sub>  | 69.4    | 69.5    | 69.4    | 69.2    | 69.1    | 69.0    | 68.9    | 68.8    | 68.8    | 68.8     |
| H <sub>2</sub> O | 11.2    | 12.1    | 12.9    | 13.3    | 13.7    | 13.9    | 14.1    | 14.2    | 9.8     | 0.4      |
| H <sub>2</sub>   | 2.4     | 1.4     | 0.8     | 0.4     | 0.1     | 0.0     | 0.0     | 0.0     | 0.0     | 0.0      |
| N <sub>2</sub>   | 2.4     | 2.4     | 2.4     | 2.4     | 2.4     | 2.4     | 2.4     | 2.4     | 2.4     | 2.4      |
| O <sub>2</sub>   | 2.1E-29 | 1.6E-31 | 5.8E-34 | 7.6E-37 | 2.8E-40 | 2.0E-44 | 1.4E-49 | 4.4E-56 | 1.4E-64 | <1.0E-70 |
| O                | 6.5E-30 | 2.6E-32 | 4.1E-35 | 2.2E-38 | 2.7E-42 | 5.2E-47 | 7.6E-53 | 3.1E-60 | 6.7E-70 | <1.0E-70 |
| CH <sub>4</sub>  | 3.7E-01 | 3.8E-01 | 3.6E-01 | 3.1E-01 | 2.6E-01 | 1.9E-01 | 1.3E-01 | 7.7E-02 | 1.8E-02 | 1.2E-05  |
| NH <sub>3</sub>  | 4.8E-04 | 4.2E-04 | 3.4E-04 | 2.6E-04 | 1.8E-04 | 1.1E-04 | 6.0E-05 | 2.7E-05 | 5.5E-06 | 1.2E-08  |
| Total P (bar)    | 87.7    | 86.5    | 86.0    | 85.7    | 85.6    | 85.6    | 85.5    | 85.5    | 81.0    | 71.6     |
| Condensed phases |         |         |         |         |         |         |         |         |         |          |
| Graphite (moles) | 1.7979  | 1.8369  | 1.8584  | 1.8711  | 1.8796  | 1.8858  | 1.8907  | 1.8946  | 1.8988  | 1.9      |
| Graphite (mass)  | 21.594  | 22.063  | 22.321  | 22.474  | 22.575  | 22.65   | 22.709  | 22.755  | 22.805  | 22.82    |
| Water (moles)    |         |         |         |         |         |         |         |         | 0.1568  | 0.48505  |
| Water (mass)     |         |         |         |         |         |         |         |         | 2.8247  | 8.7383   |

### *Effect of H/C ratio and $\log f_{\text{O}_2}$ on atmosphere speciation*

Due to the uncertainty of the solubility of H and C in peridotite liquids, we explore the effect of the H/C ratio of the atmosphere on the stability of C- and H-bearing species at both high (2173 K) and low (300 K) temperatures. Here, we keep the molar quantities of C (4.3) and N (0.17) constant, and modify the number of moles of H from 0.05 to 61.85, in order to produce molar  $\log(\text{H}/\text{C})$  ratios between -0.73 and 1.16 (the BSE ratio of ref. (24)). The moles of O are modified in order to bracket the appropriate values relative to IW at 2173 K, between  $\Delta\text{IW}-2.5$  and  $\Delta\text{IW}+2.5$ . For this exercise the total pressure is kept constant at 100 bar. In order to populate the parameter space densely enough to interpolate between individual point calculations, 21,000 Gibbs free energy minimisations were performed at both 300 K and 2173 K, and interpolated linearly to produce Fig. 4. An output of the calculation is available from the corresponding author upon request.

To explore how  $f_{\text{O}_2}$  evolves upon cooling, calculations were performed from 2173 K to 300 K at 50 K intervals, each starting with a fixed  $\Delta\text{IW}$  (-1.25), with  $\log(\text{H}/\text{C})$  varying from -0.73 to 1.05 (Fig. S10) at 100 bar. Similar trends are observed for different starting  $f_{\text{O}_2}$ , shifted to lower H/C (lower  $f_{\text{O}_2}$ ), and vice-versa. Graphite saturation is reached at progressively lower temperatures at increasing H/C ('C in' line in Fig. S10), and does not occur for  $\log(\text{H}/\text{C}) > 0.8$ . Graphite precipitation increases the  $\Delta\text{IW}$  of the atmosphere through the reaction  $\text{CO}(\text{g}) = \text{C}(\text{s}) + \frac{1}{2}\text{O}_2(\text{g})$ . For high H/C atmospheres, the lack of graphite precipitation keeps the  $\Delta\text{IW}$  relatively constant, until the condensation of liquid water. This occurs relatively isothermally (within the uncertainty of  $\pm 50$  K calculation steps) across all H/C ratios. Depending on the pre-existing composition of the atmosphere,  $\text{H}_2\text{O}$  condensation produces an increase ( $\log(\text{H}/\text{C}) < 0.4$ ), a mild- to moderate decrease ( $0.4 < \log(\text{H}/\text{C}) < 0.8$ ) or a strong decrease for  $\log(\text{H}/\text{C}) > 0.8$ . This occurs because, even though the reaction itself is independent of  $f_{\text{O}_2}$ ,  $\text{H}_2\text{O}(\text{g}) = \text{H}_2\text{O}(\text{l})$ , H is extracted at a constant molar ratio relative to O of 2:1, whereas the atmosphere contains a finite quantity of these two components. As such, removal of the minor amount of the abundant H present in a high H/C atmosphere, compared to the limited O budget of the atmosphere, has the effect of reducing  $\text{O}_2$  even further (*i.e.*, the mole fraction of O decreases at the expense of H). The situation is reversed for a low H/C atmosphere, where the removal of H increases the relative proportion of O in the atmosphere ( $X_{\text{O}}$  increases whereas  $X_{\text{H}}$  decreases), thus increasing  $\Delta\text{IW}$ .

The above discussion highlights the causes for the observed distribution of atmospheric species as a function of  $\Delta\text{IW}$  and  $\log(\text{H}/\text{C})$  displayed in Fig. 4.

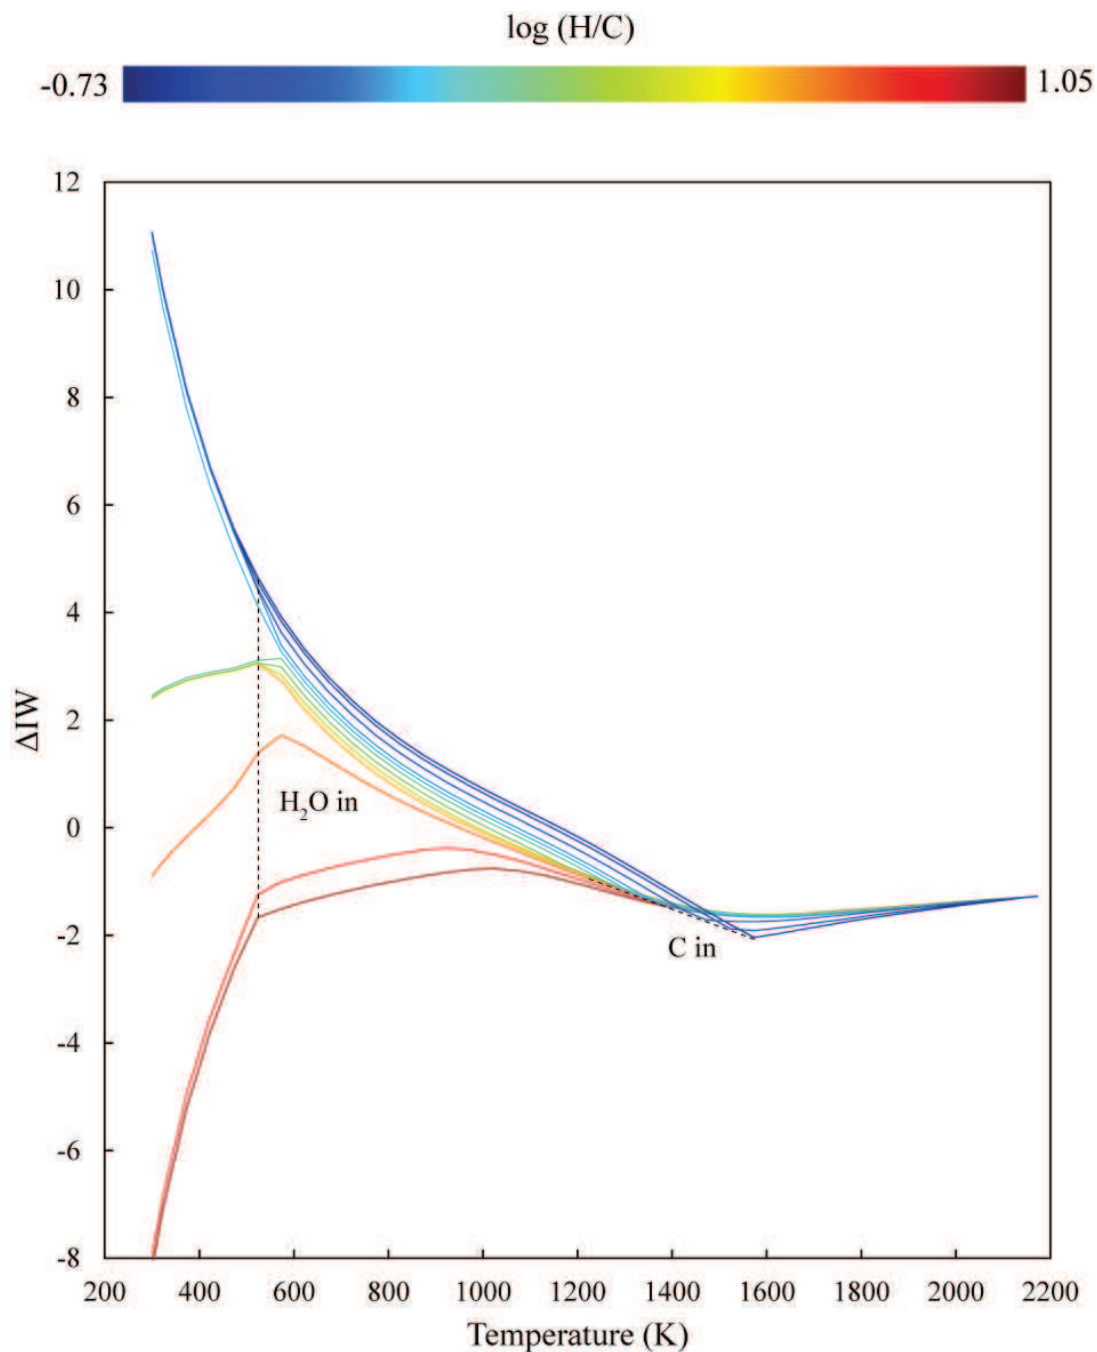

**Fig. S10. Relative oxygen fugacity as a function of temperature in a cooling magma ocean-generated atmosphere with variable H/C.** Isochemical cooling calculations showing the variation of  $fO_2$  (relative to the Iron-Wüstite buffer,  $\Delta IW$ ) as a function of absolute temperature (K). Lines are colour-coded according to the  $\log(H/C)$  of the starting gas, which all have a common  $fO_2$  of  $\Delta IW - 1.25$  at 2173 K. Graphite precipitation ('C in') and liquid water condensation ('H<sub>2</sub>O in') are demarcated by dashed black lines.

## REFERENCES AND NOTES

1. D. M. Hunten, Atmospheric evolution of the terrestrial planets. *Science* **259**, 915–920 (1993).
2. H. Lammer, A. L. Zerkle, S. Gebauer, N. Tosi, L. Noack, M. Scherf, E. Pilat-Lohinger, M. Güdel, J. L. Grenfell, M. Godolt, A. Nikolaou, Origin and evolution of the atmospheres of early Venus, Earth and Mars. *Astron. Astrophys. Rev.* **26**, 2 (2018).
3. A. Morbidelli, J. I. Lunine, D. P. O'Brien, S. N. Raymond, K. J. Walsh, Building terrestrial planets. *Annu. Rev. Earth Planet. Sci.* **40**, 251–275 (2012).
4. B. Marty, The origins and concentrations of water, carbon, nitrogen and noble gases on Earth. *Earth Planet. Sci. Lett.* **313–314**, 56–66 (2012).
5. F. Albarède, Volatile accretion history of the terrestrial planets and dynamic implications. *Nature* **461**, 1227–1233 (2009).
6. H. J. Melosh, Giant impacts and the thermal state of the early Earth, in *Origin of the Earth*, H. E. Newsom, J. H. Jones, Eds. (Oxford Univ., New York, 1990), pp. 69–83.
7. H. Genda, Y. Abe, Modification of a proto-lunar disk by hydrodynamic escape of silicate vapor. *Earth Planets Sp.* **53**, 53–57 (2003).
8. M. M. Hirschmann, Magma ocean influence on early atmosphere mass and composition. *Earth Planet. Sci. Lett.* **341–344**, 48–57 (2012).
9. K. Zahnle, L. Schaefer, B. Fegley, Earth's earliest atmospheres. *Cold Spring Harb. Perspect. Biol.* **2**, a004895 (2010).
10. F. W. Aston, The rarity of the inert gases on the Earth. *Nature* **114**, 786 (1924).
11. H. Brown, Rare gases and the formation of Earth's atmosphere, in *The Atmosphere of the Earth and Planets*, G. Kuiper, Ed. (University of Chicago Press, Chicago, 1949), pp. 258–266.
12. J. H. J. Poole, The evolution of the earth's atmosphere. *Sci. Proc. R. Dublin Soc.* **25**, 201–224 (1951).
13. H. D. Holland, Model for the evolution of the Earth's atmosphere, in *Petrologic Studies: A Volume in Honor of A.F. Buddington*, E. J. Engle, H. L. James, B. F. Leonard, Eds. (Geological Society of America, 1962), pp. 447–477.
14. R. E. Lupu, K. Zahnle, M. S. Marley, L. Schaefer, B. Fegley, C. Morley, K. Cahoy, R. Freedman, J. Fortney, The atmospheres of Earth-like planets after giant impact events. *Astrophys. J.* **784**, 1–19 (2014).
15. F. Tian, O. B. Toon, A. A. Pavlov, H. De Sterck, A hydrogen-rich early Earth atmosphere. *Science* **308**, 1014–1017 (2005).
16. H. C. Urey, On the early chemical history of the Earth and the origin of life. *Proc. Natl. Acad. Sci. U.S.A.* **38**, 351–363 (1952).
17. K. J. Zahnle, R. Lupu, D. C. Catling, N. Wogan, Creation and evolution of impact-generated reduced atmospheres of early Earth. *Planet. Sci. J.* **1**, 1–21 (2020).
18. S. L. Miller, A production of amino acids under possible primitive earth conditions. *Science* **117**, 528–529 (1953).
19. L. Schaefer, B. Fegley Jr., Redox states of initial atmospheres outgassed on rocky planets and planetesimals. *Astrophys. J.* **843**, 120 (2017).
20. Z. D. Sharp, Nebular ingassing as a source of volatiles to the terrestrial planets. *Chem. Geol.* **448**, 137–150 (2017).
21. J. F. Kasting, Earth's early atmosphere. *Science* **259**, 920–926 (1993).
22. V. Stagno, Carbon, carbides, carbonates and carbonatitic melts in the Earth's interior. *J. Geol. Soc. Lond.* **176**, 375–387 (2019).

23. D. J. Frost, U. Mann, Y. Asahara, D. C. Rubie, The redox state of the mantle during and just after core formation. *Philos. Trans. A. Math. Phys. Eng. Sci.* **366**, 4315–4337 (2008).
24. H. Palme, H. St. C. O'Neill, Cosmochemical estimates of mantle composition, in *Treatise on Geochemistry, Vol. 3: The Mantle and Core*, R. W. Carlson, Ed. (Elsevier B.V., ed. 2, 2014), pp. 1–39.
25. A. B. Woodland, J. Kornprobst, B. J. Wood, Oxygen thermobarometry of orogenic lherzolite massifs. *J. Petrol.* **33**, 203–230 (1992).
26. A. B. Woodland, M. Koch, Variation in oxygen fugacity with depth in the upper mantle beneath the Kaapvaal craton, Southern Africa. *Earth Planet. Sci. Lett.* **214**, 295–310 (2003).
27. V. Stagno, D. O. Ojwang, C. A. McCammon, D. J. Frost, The oxidation state of the mantle and the extraction of carbon from Earth's interior. *Nature* **493**, 84–88 (2013).
28. H. St. C. O'Neill, D. C. Rubie, D. Canil, C. A. Geiger, C. R. Ross II, F. Seifert, A. B. Woodland, Ferric iron in the upper mantle and in transition zone assemblages: Implications for relative oxygen fugacities in the mantle, in *Evolution of the Earth and Planets*, E. Takahashi, R. Jeanloz, D. C. Rubie, Eds. (American Geophysical Union, 1993), pp. 73–88.
29. V. C. Kress, I. S. E. Carmichael, The compressibility of silicate liquids containing Fe<sub>2</sub>O<sub>3</sub> and the effect of composition, temperature, oxygen fugacity and pressure on their redox states. *Contrib. Mineral. Petrol.* **108**, 82–92 (1991).
30. E. Cottrell, K. A. Kelley, The oxidation state of Fe in MORB glasses and the oxygen fugacity of the upper mantle. *Earth Planet. Sci. Lett.* **305**, 270–282 (2011).
31. A. J. Berry, G. A. Stewart, H. St. C. O'Neill, G. Mallmann, J. F. W. Mosselmans, A re-assessment of the oxidation state of iron in MORB glasses. *Earth Planet. Sci. Lett.* **483**, 114–123 (2018).
32. H. Wänke, G. Dreibus, Chemical composition and accretion history of terrestrial planets. *Philos. Trans. R. Soc. Lond.* **325**, 545–557 (1988).
33. A. E. Ringwood, Chemical evolution of the terrestrial planets. *Geochim. Cosmochim. Acta* **30**, 41–104 (1966).
34. E. Takahashi, Melting of a dry peridotite KLB-1 up to 14 GPa: Implications on the origin of peridotitic upper mantle. *J. Geophys. Res.* **91**, 9367–9382 (1986).
35. M. J. Walter, Melting of garnet peridotite and the origin of komatiite and depleted lithosphere. *J. Petrol.* **39**, 29–60 (1998).
36. G. S. Nikolaev, A. A. Borisov, A. A. Ariskin, Calculation of the ferric–ferrous ratio in magmatic melts: Testing and additional calibration of empirical equations for various magmatic series. **34**, 641–649 (1996).
37. A. Borisov, H. Behrens, F. Holtz, Ferric/ferrous ratio in silicate melts: A new model for 1 atm data with special emphasis on the effects of melt composition. *Contrib. Mineral. Petrol.* **173**, 98 (2018).
38. K. D. Jayasuriya, H. St. C. O'Neill, A. J. Berry, S. J. Campbell, A Mössbauer study of the oxidation state of Fe in silicate melts. *Am. Mineral.* **89**, 1597–1609 (2004).
39. H. St. C. O'Neill, A. J. Berry, G. Mallmann, The oxidation state of iron in mid-ocean ridge basaltic (MORB) glasses: Implications for their petrogenesis and oxygen fugacities. *Earth Planet. Sci. Lett.* **504**, 152–162 (2018).
40. D. Canil, H. St. C. O'Neill, D. G. Pearson, R. L. Rudnick, W. F. McDonough, D. A. Carswell, Ferric iron in peridotites and mantle oxidation states. *Earth Planet. Sci. Lett.* **123**, 205–220 (1994).
41. A. B. Woodland, J. Kornprobst, A. Tabit, Ferric iron in orogenic lherzolite massifs and controls of oxygen fugacity in the upper mantle. *Lithos* **89**, 222–241 (2006).



42. P. A. Sossi, S. Klemme, H. St. C. O'Neill, J. Berndt, F. Moynier, Evaporation of moderately volatile elements from silicate melts: Experiments and theory. *Geochim. Cosmochim. Acta* **260**, 204–231 (2019).
43. M. W. Chase, NIST-JANAF Thermochemical Tables, 4th Ed., in *Monograph 9 (Part I and Part II)* (Journal of Physical and Chemical Reference Data Monographs, ed. 4, 1998).
44. V. Solomatov, Magma oceans and primordial mantle differentiation, in *Treatise of Geophysics Second Edition*, G. Schubert, Ed. (Elsevier B.V., ed. 2, 2015), pp. 81–104.
45. A. Nikolaou, N. Katyal, N. Tosi, M. Godolt, J. L. Greenfell, H. Rauer, What factors affect the duration and outgassing of the terrestrial magma ocean? *Astrophys. J.* **875**, 11 (2019).
46. D. J. Bower, D. Kitzmann, A. S. Wolf, P. Sanan, C. Dorn, A. V. Oza, Linking the evolution of terrestrial interiors and an early outgassed atmosphere to astrophysical observations. *Astron. Astrophys.* **631**, A103 (2019).
47. S. Aulbach, V. Stagno, Evidence for a reducing Archean ambient mantle and its effects on the carbon cycle. *Geology* **44**, 751–754 (2016).
48. R. W. Nicklas, I. S. Puchtel, R. D. Ash, P. M. Piccoli, E. Hanski, E. Nisbet, P. Waterton, D. G. Pearson, A. D. Anbar, Secular mantle oxidation across the Archean-Proterozoic boundary: Evidence from V partitioning in komatiites and picrites. *Geochim. Cosmochim. Acta* **250**, 49–75 (2019).
49. J. W. Delano, Redox history of the Earth's interior since ~3900 Ma: Implications for prebiotic molecules. *Orig. Life Evol. Biosph.* **31**, 311–341 (2001).
50. D. Trail, E. B. Watson, N. D. Tailby, The oxidation state of Hadean magmas and implications for early Earth's atmosphere. *Nature* **480**, 79–82 (2011).
51. A. Bézou, E. Humler, The  $\text{Fe}^{3+}/\Sigma\text{Fe}$  ratios of MORB glasses and their implications for mantle melting. *Geochim. Cosmochim. Acta* **69**, 711–725 (2005).
52. K. Armstrong, D. J. Frost, C. A. McCammon, D. C. Rubie, T. Boffa Ballaran, Deep magma ocean formation set the oxidation state of Earth's mantle. *Science* **365**, 903–906 (2019).
53. M. M. Hirschmann, Comparative deep Earth volatile cycles: The case for C recycling from exosphere/mantle fractionation of major ( $\text{H}_2\text{O}$ , C, N) volatiles and from  $\text{H}_2\text{O}/\text{Ce}$ ,  $\text{CO}_2/\text{Ba}$ , and  $\text{CO}_2/\text{Nb}$  exosphere ratios. *Earth Planet. Sci. Lett.* **502**, 262–273 (2018).
54. G. Moore, T. Vennemann, I. S. E. Carmichael, An empirical model for the solubility of  $\text{H}_2\text{O}$  in magmas to 3 kilobars. *Am. Mineral.* **83**, 36–42 (1998).
55. J. E. Dixon, E. M. Stolper, J. R. Holloway, An experimental study of water and carbon dioxide solubilities in mid-ocean ridge basaltic liquids. Part I: Calibrations and solubility models. *J. Petrol.* **36**, 1607–1631 (1995).
56. G. Libourel, B. Marty, F. Humbert, Nitrogen solubility in basaltic melt. Part I. Effect of oxygen fugacity. *Geochim. Cosmochim. Acta* **67**, 4123–4135 (2003).
57. D. T. Wetzel, M. J. Rutherford, S. D. Jacobsen, E. H. Hauri, A. E. Saal, Degassing of reduced carbon from planetary basalts. *Proc. Natl. Acad. Sci. U.S.A.* **110**, 8010–8013 (2013).
58. E. Stolper, Water in silicate glasses: An infrared spectroscopic study. *Contrib. Mineral. Petrol.* **81**, 1–17 (1982).
59. D. S. Grewal, R. Dasgupta, C. Sun, K. Tsuno, G. Costin, Delivery of carbon, nitrogen, and sulfur to the silicate Earth by a giant impact. *Sci. Adv.* **5**, eaau3669 (2019).
60. T. Yoshioka, D. Nakashima, T. Nakamura, S. Shcheka, H. Keppler, Carbon solubility in silicate melts in equilibrium with a  $\text{CO}-\text{CO}_2$  gas phase and graphite. *Geochim. Cosmochim. Acta* **259**, 129–143 (2019).

61. C. W. Bale, E. Bélisle, P. Chartrand, S. A. Decterov, G. Eriksson, A. E. Gheribi, K. Hack, I.-H. Jung, Y.-B. Kang, J. Melançon, A. D. Pelton, S. Petersen, C. Robelin, J. Sangster, P. Spencer, M.-A. Van Ende, FactSage thermochemical software and databases, 2010-2016. *Calphad* **55**, 1–19 (2016).
62. H. Keppler, G. Golabek, Graphite floatation on a magma ocean and the fate of carbon during core formation. *Geochem. Perspect. Lett.* **11**, 12–17 (2019).
63. A. Toramaru, N. Fujii, Connectivity of melt phase in a partially molten peridotite. *J. Geophys. Res.* **91**, 9239–9252 (1986).
64. L. T. Elkins-Tanton, Linked magma ocean solidification and atmospheric growth for Earth and Mars. *Earth Planet. Sci. Lett.* **271**, 181–191 (2008).
65. S. Hier-Majumder, M. M. Hirschmann, The origin of volatiles in the Earth's mantle. *Geochem. Geophys. Geosyst.* **18**, 3078–3092 (2017).
66. Q. Bai, D. L. Kohlstedt, Substantial hydrogen solubility in olivine and implications for water storage in the mantle. *Nature* **357**, 672–674 (1992).
67. K. J. Zahnle, M. S. Marley, Methane, carbon monoxide, and ammonia in brown dwarfs and self-luminous giant planets. *Astrophys. J.* **797**, 41 (2014).
68. A. C. Lasaga, H. D. Holland, M. J. Dwyer, Primordial oil slick. *Science* **174**, 53–55 (1971).
69. L. Schaefer, K. Lodders, B. Fegley, Vaporization of the earth: Application to exoplanet atmospheres. *Astrophys. J.* **755**, 41 (2012).
70. M. Fischer-Gödde, B.-M. Elfers, C. Münker, K. Szilas, W. D. Maier, N. Messling, T. Morishita, M. van Kranendonk, H. Smithies, Ruthenium isotope vestige of Earth's pre-late-veener mantle preserved in Archaean rocks. *Nature* **579**, 240–244 (2020).
71. G. Mallmann, H. St. C. O'Neill, The crystal/melt partitioning of V during mantle melting as a function of oxygen fugacity compared with some other elements (Al, P, Ca, Sc, Ti, Cr, Fe, Ga, Y, Zr and Nb). *J. Petrol.* **50**, 1765–1794 (2009).
72. G. Dreibus, H. Wanke, Volatiles on Earth and Mars: A comparison. *Icarus* **71**, 225–240 (1987).
73. D. P. O'Brien, A. Izidoro, S. A. Jacobson, S. N. Raymond, D. C. Rubie, The delivery of water during terrestrial planet formation. *Space Sci. Rev.* **214**, 47 (2018).
74. J. F. Kasting, Runaway and moist greenhouse atmospheres and the evolution of Earth and Venus. *Icarus* **74**, 472–494 (1988).
75. M. H. Carr, Mars: A water-rich planet? *Icarus* **68**, 187–216 (1986).
76. L. H. Kellogg, H. Lokavarapu, D. L. Turcotte, Carbonation and the Urey reaction. *Am. Mineral.* **104**, 1365–1368 (2019).
77. L.-g. Liu, The inception of the oceans and CO<sub>2</sub>-atmosphere in the early history of the Earth. **227**, 179–184 (2004).
78. N. H. Sleep, K. Zahnle, P. S. Neuhoff, Initiation of clement surface conditions on the earliest Earth. *Proc. Natl. Acad. Sci. U.S.A.* **98**, 3666–3672 (2001).
79. F. Nimmo, D. McKenzie, Volcanism and tectonics on Venus. *Annu. Rev. Earth Planet. Sci.* **26**, 23–51 (1998).
80. P. Van Thienen, N. J. Vlaar, A. P. Van Den Berg, Plate tectonics on the terrestrial planets. *Phys. Earth Planet. Inter.* **142**, 61–74 (2004).
81. H. J. Cleaves, J. H. Chalmers, A. Lazcano, S. L. Miller, J. L. Bada, A reassessment of prebiotic organic synthesis in neutral planetary atmospheres. *Orig. Life Evol. Biosph.* **38**, 105–115 (2008).
82. A.-L. Auzende, J. Gillot, A. Coquet, L. Hennet, G. Ona-Nguema, D. Bonnin, I. Esteve, M. Roskosz, G. Fiquet, Synthesis of amorphous MgO-rich peridotitic starting material for laser-heated diamond anvil cell experiments – application to iron partitioning in the mantle. *High Press. Res.* **31**, 199–213 (2011).

83. W. E. Jackson, F. Farges, M. Yeager, P. A. Mabrouk, S. Rossano, G. A. Waychunas, E. I. Solomon, G. E. Brown Jr., Multi-spectroscopic study of Fe(II) in silicate glasses: Implications for the coordination environment of Fe(II) in silicate melts. *Geochim. Cosmochim. Acta* **69**, 4315–4332 (2005).
84. S. Bajt, S. R. Sutton, J. S. Delaney, X-ray microprobe analysis of iron oxidation states in silicates and oxides using x-ray absorption near edge structure (XANES). *Geochim. Cosmochim. Acta* **58**, 5209–5214 (1994).
85. J. E. Mungall, Empirical models relating viscosity and tracer diffusion in magmatic silicate melts. *Geochim. Cosmochim. Acta* **66**, 125–143 (2002).
86. Y. Zhang, H. Ni, Y. Chen, Diffusion data in silicate melts. *Rev. Mineral. Geochem.* **72**, 311–408 (2010).
87. H. St. C. O'Neill, S. M. Eggins, The effect of melt composition on trace element partitioning: An experimental investigation of the activity coefficients of FeO, NiO, CoO, MoO<sub>2</sub> and MoO<sub>3</sub> in silicate melts. *Chem. Geol.* **186**, 151–181 (2002).
88. V. P. Glushko, V. A. Medvedev, L. V. Gurvich, V. S. Yungman, *Thermal Constants of Substances* (John Wiley & Sons, ed. 1, 1999).
89. W. F. McDonough, S.-s. Sun, The composition of the Earth. *Chem. Geol.* **120**, 223–253 (1995).
90. D. Canil, H. St. C. O'Neill, Distribution of ferric iron in some upper-mantle assemblages. *J. Petrol.* **37**, 609–635 (1996).
91. F. R. Boyd, D. G. Pearson, P. H. Nixon, S. A. Mertzman, Low-calcium garnet harzburgites from southern Africa: Their relations to craton structure and diamond crystallization. *Contrib. Mineral. Petrol.* **113**, 352–366 (1993).
92. F. A. Frey, D. H. Green, The mineralogy, geochemistry and origin of Iherzolite inclusions in Victorian basanites. *Geochem. Cosmochim. Acta* **38**, 1023–1059 (1974).
93. L. E. Wasylenki, M. B. Baker, A. J. R. Kent, E. M. Stolper, Near-solidus melting of the shallow upper mantle: Partial melting experiments on depleted peridotite. *J. Petrol.* **44**, 1163–1191 (2003).
94. M. J. Walter, Melt extraction and compositional variability in mantle lithosphere, in *Treatise on Geochemistry*, R. W. Carlson, Ed. (Elsevier, 2003), vol. 2, pp. 363–394.
95. R. K. Workman, S. R. Hart, Major and trace element composition of the depleted MORB mantle (DMM). *Earth Planet. Sci. Lett.* **231**, 53–72 (2005).
96. Z. Wang, H. Becker, Ratios of S, Se and Te in the silicate Earth require a volatile-rich late veneer. *Nature* **499**, 328–331 (2013).
97. M. M. Hirschmann, A. C. Withers, P. Ardia, N. T. Foley, Solubility of molecular hydrogen in silicate melts and consequences for volatile evolution of terrestrial planets. *Earth Planet. Sci. Lett.* **345–348**, 38–48 (2012).
98. E. Stolper, J. R. Holloway, Experimental determination of the solubility of carbon dioxide in molten basalt at low pressure. *Earth Planet. Sci. Lett.* **87**, 397–408 (1988).
99. D. L. Hamilton, S. Oxtoby, Solubility of water in albite-melt determined by the weight-loss method. *J. Geol.* **94**, 626–630 (1986).
100. V. Pan, J. R. Holloway, R. L. Hervig, The pressure and temperature dependence of carbon dioxide solubility in tholeiitic basalt melts. *Geochim. Cosmochim. Acta* **55**, 1587–1595 (1991).
